# Supplementary material for: Circulating miR-499a and miR-125b as Potential Predictors of Left Ventricular Ejection Fraction Improvement after Cardiac Resynchronization Therapy
Source: MDPI journal article supplement (doi:10.3390/cells11020271), 2022-01-13
Supplement: s1 [file s1]

**Supplementary Table S1: Basal miRNAs changes in responders vs non-responders.**

|                 | P<br>value | Mean of<br>Non-<br>responders | Mean of<br>Responders | Difference | SE of difference | Quality |
|-----------------|------------|-------------------------------|-----------------------|------------|------------------|---------|
| hsa-let-7a-5p   | 0.885      | 4.827                         | 5.204                 | -0.376     | 2.572            | OK      |
| hsa-let-7b-5p   | 0.706      | 15.446                        | 18.949                | -3.503     | 9.183            | OK      |
| hsa-let-7c-5p   | 0.280      | 1.257                         | 3.322                 | -2.065     | 1.865            | OK      |
| hsa-let-7d-5p   | 0.512      | 4.178                         | 6.181                 | -2.003     | 3.009            | OK      |
| hsa-let-7e-5p   | 0.592      | 2.628                         | 1.884                 | 0.744      | 1.369            | OK      |
| hsa-let-7f-5p   | 0.442      | 1.133                         | 0.643                 | 0.490      | 0.626            | OK      |
| hsa-miR-1-3p    | 0.647      | 0.145                         | 0.125                 | 0.020      | 0.043            | OK      |
| hsa-miR-100-5p  | 0.596      | 0.513                         | 0.626                 | -0.113     | 0.210            | OK      |
| hsa-miR-103a-3p | 0.757      | 0.234                         | 0.193                 | 0.041      | 0.131            | OK      |
| hsa-miR-107     | 0.037*     | 0.130                         | 0.061                 | 0.069      | 0.031            | OK      |
| hsa-miR-10b-5p  | 0.529      | 0.113                         | 0.094                 | 0.019      | 0.030            | OK      |
| hsa-miR-122-5p  | 0.966      | 7.027                         | 6.736                 | 0.291      | 6.725            | OK      |
| hsa-miR-124-3p  | 0.082      | 0.170                         | 0.087                 | 0.083      | 0.046            | OK      |
| hsa-miR-125a-5p | 0.367      | 0.974                         | 1.338                 | -0.365     | 0.396            | OK      |
| hsa-miR-125b-5p | 0.141      | 0.382                         | 0.794                 | -0.413     | 0.271            | OK      |
| hsa-miR-126-3p  | 0.106      | 3.815                         | 17.158                | -13.343    | 7.924            | OK      |
| hsa-miR-130a-3p | 0.099      | 0.268                         | 0.567                 | -0.298     | 0.174            | OK      |
| hsa-miR-133a-3p | 0.033      | 0.095                         | 0.044                 | 0.051      | 0.022            | A       |
| hsa-miR-133b    | 0.038      | 0.095                         | 0.046                 | 0.049      | 0.022            | A       |
| hsa-miR-140-5p  | 0.208      | 0.102                         | 34.336                | -34.234    | 26.401           | OK      |

|                 |       |        |        |         |        |    |
|-----------------|-------|--------|--------|---------|--------|----|
| hsa-miR-142-3p  | 0.214 | 0.177  | 52.452 | -52.275 | 40.904 | OK |
| hsa-miR-143-3p  | 0.265 | 0.101  | 0.294  | -0.193  | 0.169  | OK |
| hsa-miR-144-3p  | 0.271 | 0.213  | 0.346  | -0.133  | 0.118  | OK |
| hsa-miR-145-5p  | 0.729 | 0.244  | 0.219  | 0.025   | 0.072  | OK |
| hsa-miR-146a-5p | 0.287 | 0.667  | 1.126  | -0.459  | 0.421  | OK |
| hsa-miR-149-5p  | 0.307 | 0.095  | 0.313  | -0.218  | 0.208  | A  |
| hsa-miR-150-5p  | 0.288 | 4.722  | 8.002  | -3.280  | 3.016  | OK |
| hsa-miR-155-5p  | 0.242 | 0.103  | 0.728  | -0.625  | 0.521  | OK |
| hsa-miR-15b-5p  | 0.884 | 6.188  | 5.685  | 0.503   | 3.423  | OK |
| hsa-miR-16-5p   | 0.481 | 23.497 | 35.660 | -12.163 | 16.962 | OK |
| hsa-miR-106a-5p | 0.117 | 0.454  | 0.961  | -0.507  | 0.311  | OK |
| hsa-miR-17-5p   |       |        |        |         |        |    |
| hsa-miR-181a-5p | 0.319 | 0.102  | 0.278  | -0.176  | 0.172  | OK |
| hsa-miR-181b-5p | 0.183 | 0.193  | 0.702  | -0.508  | 0.370  | OK |
| hsa-miR-182-5p  | 0.086 | 0.206  | 0.057  | 0.148   | 0.083  | OK |
| hsa-miR-183-5p  | 0.365 | 0.469  | 0.158  | 0.311   | 0.337  | OK |
| hsa-miR-185-5p  | 0.989 | 0.800  | 0.807  | -0.007  | 0.522  | OK |
| hsa-miR-18b-5p  | 0.692 | 0.110  | 0.136  | -0.026  | 0.064  | OK |
| hsa-miR-195-5p  | 0.711 | 18.656 | 23.161 | -4.505  | 12.029 | OK |
| hsa-miR-199a-5p | 0.331 | 0.097  | 0.224  | -0.127  | 0.128  | OK |
| hsa-miR-206     | 0.244 | 0.103  | 0.562  | -0.459  | 0.384  | OK |
| hsa-miR-208a-3p | 0.248 | 0.095  | 0.744  | -0.649  | 0.548  | A  |
| hsa-miR-208b-3p | 0.226 | 0.095  | 1.898  | -1.803  | 1.451  | A  |
| hsa-miR-21-5p   | 0.904 | 27.804 | 29.057 | -1.253  | 10.309 | OK |
| hsa-miR-210-3p  | 0.271 | 0.097  | 0.468  | -0.372  | 0.330  | OK |
| hsa-miR-214-3p  | 0.286 | 0.096  | 0.349  | -0.253  | 0.232  | OK |

|                 |        |        |        |         |       |    |
|-----------------|--------|--------|--------|---------|-------|----|
| hsa-miR-22-3p   | 0.139  | 0.469  | 3.510  | -3.041  | 1.984 | OK |
| hsa-miR-221-3p  | 0.233  | 0.411  | 0.732  | -0.321  | 0.262 | OK |
| hsa-miR-222-3p  | 0.195  | 0.528  | 8.470  | -7.942  | 5.948 | OK |
| hsa-miR-223-3p  | 0.473  | 19.092 | 26.302 | -7.210  | 9.884 | OK |
| hsa-miR-224-5p  | 0.266  | 0.099  | 0.248  | -0.149  | 0.131 | OK |
| hsa-miR-23a-3p  | 0.402  | 6.975  | 9.253  | -2.278  | 2.666 | OK |
| hsa-miR-23b-3p  | 0.422  | 0.880  | 1.148  | -0.268  | 0.327 | OK |
| hsa-miR-24-3p   | 0.193  | 0.650  | 1.111  | -0.461  | 0.344 | OK |
| hsa-miR-25-3p   | 0.194  | 13.531 | 26.764 | -13.233 | 9.901 | OK |
| hsa-miR-26a-5p  | 0.940  | 5.019  | 4.807  | 0.211   | 2.758 | OK |
| hsa-miR-26b-5p  | 0.612  | 3.341  | 2.318  | 1.024   | 1.993 | OK |
| hsa-miR-27a-3p  | 0.232  | 1.561  | 2.799  | -1.238  | 1.008 | OK |
| hsa-miR-27b-3p  | 0.533  | 0.816  | 1.116  | -0.300  | 0.475 | OK |
| hsa-miR-29a-3p  | 0.206  | 0.311  | 7.431  | -7.120  | 5.467 | OK |
| hsa-miR-29b-3p  | 0.517  | 0.445  | 0.276  | 0.169   | 0.257 | OK |
| hsa-miR-29c-3p  | 0.316  | 0.616  | 0.944  | -0.328  | 0.320 | OK |
| hsa-miR-302a-3p | 0.222  | 0.095  | 0.064  | 0.031   | 0.025 | A  |
| hsa-miR-302b-3p | 0.042* | 0.095  | 0.048  | 0.047   | 0.022 | A  |
| hsa-miR-30a-5p  | 0.229  | 1.127  | 1.835  | -0.708  | 0.572 | OK |
| hsa-miR-30c-5p  | 0.379  | 0.469  | 0.673  | -0.205  | 0.228 | OK |
| hsa-miR-30d-5p  | 0.086  | 0.765  | 1.407  | -0.642  | 0.358 | OK |
| hsa-miR-30e-5p  | 0.187  | 0.960  | 13.015 | -12.055 | 8.864 | OK |
| hsa-miR-31-5p   | 0.220  | 0.095  | 1.602  | -1.507  | 1.196 | A  |
| hsa-miR-320a    | 0.926  | 4.116  | 4.287  | -0.171  | 1.832 | OK |
| hsa-miR-328-3p  | 0.425  | 1.047  | 2.092  | -1.045  | 1.286 | OK |

|                 |        |         |         |         |        |    |
|-----------------|--------|---------|---------|---------|--------|----|
| hsa-miR-342-3p  | 0.443  | 0.965   | 1.273   | -0.309  | 0.395  | OK |
| hsa-miR-365a-3p |        |         |         |         |        | OK |
| hsa-miR-365b-3p | 0.230  | 0.197   | 0.453   | -0.256  | 0.208  |    |
| hsa-miR-378a-3p | 0.833  | 0.120   | 0.116   | 0.005   | 0.022  | OK |
| hsa-miR-423-3p  | 0.239  | 0.113   | 0.158   | -0.045  | 0.037  | OK |
| hsa-miR-424-5p  | 0.143  | 0.665   | 1.166   | -0.500  | 0.330  | OK |
| hsa-miR-451a    | 0.200  | 70.014  | 141.105 | -71.091 | 53.863 | OK |
| hsa-miR-486-5p  | 0.428  | 179.933 | 240.608 | -60.675 | 75.210 | OK |
| hsa-miR-494-3p  | 0.051  | 0.096   | 0.050   | 0.046   | 0.022  | OK |
| hsa-miR-499a-5p | 0.033* | 0.097   | 0.048   | 0.049   | 0.022  | OK |
| hsa-miR-7-5p    | 0.739  | 0.549   | 0.438   | 0.111   | 0.328  | OK |
| hsa-miR-92a-3p  | 0.117  | 32.346  | 60.851  | -28.505 | 17.487 | OK |
| hsa-miR-93-5p   | 0.272  | 0.727   | 1.232   | -0.505  | 0.449  | OK |
| hsa-miR-98-5p   | 0.256  | 0.116   | 0.339   | -0.223  | 0.192  | OK |
| hsa-miR-99a-5p  | 0.681  | 0.264   | 0.303   | -0.039  | 0.095  | OK |

**Supplementary Table S2: 6 months miRNAs changes in responders vs non-responders.**

|               | P<br>value | Mean of<br>Non-<br>responders | Mean of<br>Responders | Difference | SE of difference | Quality |
|---------------|------------|-------------------------------|-----------------------|------------|------------------|---------|
| hsa-let-7a-5p | 0.524      | 6.505                         | 10.175                | -3.670     | 5.663            | OK      |
| hsa-let-7b-5p | 0.747      | 22.259                        | 19.224                | 3.035      | 9.279            | OK      |
| hsa-let-7c-5p | 0.380      | 1.388                         | 3.484                 | -2.097     | 2.338            | OK      |
| hsa-let-7d-5p | 0.556      | 5.409                         | 7.598                 | -2.189     | 3.663            | OK      |

|                 |       |       |        |         |        |    |
|-----------------|-------|-------|--------|---------|--------|----|
| hsa-let-7e-5p   | 0.372 | 2.816 | 1.995  | 0.821   | 0.901  | OK |
| hsa-let-7f-5p   | 0.967 | 1.062 | 1.085  | -0.023  | 0.556  | OK |
| hsa-miR-1-3p    | 0.286 | 0.051 | 0.076  | -0.024  | 0.022  | OK |
| hsa-miR-100-5p  | 0.902 | 0.386 | 0.398  | -0.012  | 0.093  | OK |
| hsa-miR-103a-3p | 0.589 | 0.146 | 0.178  | -0.032  | 0.058  | OK |
| hsa-miR-107     | 0.362 | 0.058 | 0.047  | 0.012   | 0.013  | OK |
| hsa-miR-10b-5p  | 0.277 | 0.079 | 0.062  | 0.017   | 0.015  | OK |
| hsa-miR-122-5p  | 0.779 | 3.521 | 3.097  | 0.424   | 1.489  | OK |
| hsa-miR-124-3p  | 0.894 | 0.078 | 0.074  | 0.005   | 0.034  | OK |
| hsa-miR-125a-5p | 0.668 | 1.186 | 1.384  | -0.198  | 0.454  | OK |
| hsa-miR-125b-5p | 0.580 | 0.221 | 0.273  | -0.052  | 0.093  | OK |
| hsa-miR-126-3p  | 0.346 | 6.108 | 15.748 | -9.640  | 10.002 | OK |
| hsa-miR-130a-3p | 0.440 | 0.425 | 0.301  | 0.124   | 0.158  | OK |
| hsa-miR-133a-3p | 0.757 | 0.042 | 0.038  | 0.004   | 0.013  | B  |
| hsa-miR-133b    | 0.757 | 0.042 | 0.038  | 0.004   | 0.013  | B  |
| hsa-miR-140-5p  | 0.386 | 0.053 | 45.586 | -45.533 | 51.454 | OK |
| hsa-miR-142-3p  | 0.426 | 0.165 | 6.899  | -6.734  | 8.287  | OK |
| hsa-miR-143-3p  | 0.414 | 0.051 | 0.179  | -0.128  | 0.153  | OK |
| hsa-miR-144-3p  | 0.746 | 0.186 | 0.166  | 0.020   | 0.062  | OK |
| hsa-miR-145-5p  | 0.403 | 0.126 | 0.147  | -0.021  | 0.025  | OK |
| hsa-miR-146a-5p | 0.307 | 1.271 | 2.038  | -0.766  | 0.732  | OK |
| hsa-miR-149-5p  | 0.427 | 0.042 | 0.166  | -0.124  | 0.153  | A  |
| hsa-miR-150-5p  | 0.997 | 9.981 | 9.992  | -0.011  | 3.412  | OK |
| hsa-miR-155-5p  | 0.392 | 0.056 | 0.834  | -0.778  | 0.891  | OK |
| hsa-miR-15b-5p  | 0.566 | 9.181 | 7.249  | 1.932   | 3.309  | OK |

|                 |       |        |        |         |        |    |
|-----------------|-------|--------|--------|---------|--------|----|
| hsa-miR-16-5p   | 0.446 | 49.115 | 35.962 | 13.153  | 16.919 | OK |
| hsa-miR-106a-5p |       |        |        |         |        |    |
| hsa-miR-17-5p   | 0.935 | 0.650  | 0.671  | -0.021  | 0.259  | OK |
| hsa-miR-181a-5p | 0.487 | 0.046  | 0.074  | -0.028  | 0.039  | OK |
| hsa-miR-181b-5p | 0.563 | 0.214  | 0.348  | -0.134  | 0.229  | OK |
| hsa-miR-182-5p  | 0.240 | 0.066  | 0.049  | 0.016   | 0.013  | OK |
| hsa-miR-183-5p  | 0.072 | 0.204  | 0.087  | 0.117   | 0.062  | OK |
| hsa-miR-185-5p  | 0.398 | 1.055  | 0.665  | 0.390   | 0.452  | OK |
| hsa-miR-18b-5p  | 0.670 | 0.060  | 0.066  | -0.006  | 0.015  | OK |
| hsa-miR-195-5p  | 0.462 | 28.371 | 21.246 | 7.125   | 9.505  | OK |
| hsa-miR-199a-5p | 0.393 | 0.042  | 0.125  | -0.083  | 0.095  | A  |
| hsa-miR-206     | 0.426 | 0.042  | 0.372  | -0.330  | 0.406  | OK |
| hsa-miR-208a-3p | 0.388 | 0.042  | 0.124  | -0.082  | 0.093  | A  |
| hsa-miR-208b-3p | 0.367 | 0.042  | 0.315  | -0.273  | 0.296  | A  |
| hsa-miR-21-5p   | 0.718 | 28.913 | 25.854 | 3.059   | 8.355  | OK |
| hsa-miR-210-3p  | 0.454 | 0.043  | 0.113  | -0.070  | 0.092  | OK |
| hsa-miR-214-3p  | 0.438 | 0.042  | 0.142  | -0.100  | 0.126  | OK |
| hsa-miR-22-3p   | 0.568 | 0.870  | 1.374  | -0.504  | 0.869  | OK |
| hsa-miR-221-3p  | 0.663 | 0.798  | 0.950  | -0.152  | 0.345  | OK |
| hsa-miR-222-3p  | 0.418 | 1.183  | 2.249  | -1.066  | 1.291  | OK |
| hsa-miR-223-3p  | 0.575 | 46.015 | 56.946 | -10.931 | 19.202 | OK |
| hsa-miR-224-5p  | 0.116 | 0.096  | 0.236  | -0.139  | 0.085  | OK |
| hsa-miR-23a-3p  | 0.397 | 11.066 | 15.013 | -3.947  | 4.564  | OK |
| hsa-miR-23b-3p  | 0.528 | 1.340  | 1.686  | -0.346  | 0.538  | OK |
| hsa-miR-24-3p   | 0.348 | 1.113  | 1.646  | -0.533  | 0.555  | OK |
| hsa-miR-25-3p   | 0.284 | 37.101 | 20.753 | 16.348  | 14.856 | OK |

|                 |       |         |         |         |         |    |
|-----------------|-------|---------|---------|---------|---------|----|
| hsa-miR-26a-5p  | 0.324 | 6.703   | 10.313  | -3.610  | 3.577   | OK |
| hsa-miR-26b-5p  | 0.677 | 3.627   | 4.372   | -0.745  | 1.761   | OK |
| hsa-miR-27a-3p  | 0.834 | 1.898   | 2.009   | -0.111  | 0.524   | OK |
| hsa-miR-27b-3p  | 0.677 | 0.793   | 0.896   | -0.104  | 0.245   | OK |
| hsa-miR-29a-3p  | 0.421 | 0.357   | 1.403   | -1.046  | 1.276   | OK |
| hsa-miR-29b-3p  | 0.821 | 0.391   | 0.364   | 0.027   | 0.118   | OK |
| hsa-miR-29c-3p  | 0.674 | 0.670   | 0.750   | -0.080  | 0.187   | OK |
| hsa-miR-302a-3p | 0.789 | 0.042   | 0.038   | 0.003   | 0.013   | A  |
| hsa-miR-302b-3p | 0.757 | 0.042   | 0.038   | 0.004   | 0.013   | B  |
| hsa-miR-30a-5p  | 0.872 | 1.814   | 1.920   | -0.106  | 0.654   | OK |
| hsa-miR-30c-5p  | 0.653 | 0.928   | 1.093   | -0.165  | 0.362   | OK |
| hsa-miR-30d-5p  | 0.824 | 1.284   | 1.391   | -0.107  | 0.477   | OK |
| hsa-miR-30e-5p  | 0.412 | 1.394   | 3.123   | -1.728  | 2.063   | OK |
| hsa-miR-31-5p   | 0.380 | 0.042   | 0.286   | -0.243  | 0.272   | OK |
| hsa-miR-320a    | 0.275 | 6.955   | 3.157   | 3.798   | 3.389   | OK |
| hsa-miR-328-3p  | 0.435 | 0.475   | 0.850   | -0.375  | 0.470   | OK |
| hsa-miR-342-3p  | 0.690 | 1.595   | 1.769   | -0.173  | 0.428   | OK |
| hsa-miR-365a-3p |       |         |         |         |         |    |
| hsa-miR-365b-3p | 0.541 | 0.122   | 0.166   | -0.043  | 0.070   | OK |
| hsa-miR-378a-3p | 0.407 | 0.078   | 0.064   | 0.013   | 0.016   | OK |
| hsa-miR-423-3p  | 0.223 | 0.122   | 0.188   | -0.066  | 0.052   | OK |
| hsa-miR-424-5p  | 0.622 | 1.008   | 0.851   | 0.158   | 0.315   | OK |
| hsa-miR-451a    | 0.470 | 172.594 | 123.802 | 48.792  | 66.325  | OK |
| hsa-miR-486-5p  | 0.108 | 309.785 | 127.445 | 182.341 | 108.739 | OK |
| hsa-miR-494-3p  | 0.661 | 0.048   | 0.054   | -0.006  | 0.013   | OK |
| hsa-miR-499a-5p | 0.757 | 0.042   | 0.038   | 0.004   | 0.013   | B  |

|                |       |        |        |        |        |    |
|----------------|-------|--------|--------|--------|--------|----|
| hsa-miR-7-5p   | 0.373 | 0.553  | 0.366  | 0.187  | 0.205  | OK |
| hsa-miR-92a-3p | 0.210 | 72.371 | 40.223 | 32.148 | 24.854 | OK |
| hsa-miR-93-5p  | 0.381 | 1.503  | 1.022  | 0.481  | 0.538  | OK |
| hsa-miR-98-5p  | 0.188 | 0.095  | 0.204  | -0.109 | 0.080  | OK |
| hsa-miR-99a-5p | 0.987 | 0.191  | 0.190  | 0.001  | 0.043  | OK |

**Supplementary Table S3: Longitudinal miRNAs changes in responders group**

|                 | P value | Mean of 6 Months | Mean of Basal | Difference | SE of difference | Quality |
|-----------------|---------|------------------|---------------|------------|------------------|---------|
| hsa-let-7a-5p   | 0.277   | 10.175           | 5.204         | 4.971      | 4.481            | OK      |
| hsa-let-7b-5p   | 0.972   | 19.224           | 18.949        | 0.276      | 7.862            | OK      |
| hsa-let-7c-5p   | 0.947   | 3.484            | 3.322         | 0.162      | 2.418            | OK      |
| hsa-let-7d-5p   | 0.647   | 7.598            | 6.181         | 1.417      | 3.057            | OK      |
| hsa-let-7e-5p   | 0.890   | 1.995            | 1.884         | 0.112      | 0.798            | OK      |
| hsa-let-7f-5p   | 0.338   | 1.085            | 0.643         | 0.442      | 0.453            | OK      |
| hsa-miR-1-3p    | 0.152   | 0.076            | 0.125         | -0.049     | 0.033            | OK      |
| hsa-miR-100-5p  | 0.184   | 0.398            | 0.626         | -0.228     | 0.167            | OK      |
| hsa-miR-103a-3p | 0.853   | 0.178            | 0.193         | -0.015     | 0.080            | OK      |
| hsa-miR-107     | 0.327   | 0.047            | 0.061         | -0.014     | 0.014            | OK      |
| hsa-miR-10b-5p  | 0.172   | 0.062            | 0.094         | -0.032     | 0.023            | OK      |
| hsa-miR-122-5p  | 0.412   | 3.097            | 6.736         | -3.639     | 4.367            | OK      |
| hsa-miR-124-3p  | 0.674   | 0.074            | 0.087         | -0.013     | 0.031            | OK      |
| hsa-miR-125a-5p | 0.919   | 1.384            | 1.338         | 0.045      | 0.441            | OK      |



|                 |        |        |        |         |        |    |
|-----------------|--------|--------|--------|---------|--------|----|
| hsa-miR-125b-5p | 0.031* | 0.273  | 0.794  | -0.521  | 0.229  | OK |
| hsa-miR-126-3p  | 0.895  | 15.748 | 17.158 | -1.410  | 10.540 | OK |
| hsa-miR-130a-3p | 0.042* | 0.301  | 0.567  | -0.266  | 0.124  | OK |
| hsa-miR-133a-3p | 0.650  | 0.038  | 0.044  | -0.006  | 0.014  | B  |
| hsa-miR-133b    | 0.540  | 0.038  | 0.046  | -0.008  | 0.014  | A  |
| hsa-miR-140-5p  | 0.813  | 45.586 | 34.336 | 11.250  | 47.075 | OK |
| hsa-miR-142-3p  | 0.225  | 6.899  | 52.452 | -45.553 | 36.686 | OK |
| hsa-miR-143-3p  | 0.555  | 0.179  | 0.294  | -0.115  | 0.192  | OK |
| hsa-miR-144-3p  | 0.051  | 0.166  | 0.346  | -0.180  | 0.088  | OK |
| hsa-miR-145-5p  | 0.142  | 0.147  | 0.219  | -0.072  | 0.047  | OK |
| hsa-miR-146a-5p | 0.164  | 2.038  | 1.126  | 0.912   | 0.637  | OK |
| hsa-miR-149-5p  | 0.509  | 0.166  | 0.313  | -0.147  | 0.220  | OK |
| hsa-miR-150-5p  | 0.562  | 9.992  | 8.002  | 1.990   | 3.387  | OK |
| hsa-miR-155-5p  | 0.902  | 0.834  | 0.728  | 0.106   | 0.844  | OK |
| hsa-miR-15b-5p  | 0.424  | 7.249  | 5.685  | 1.564   | 1.925  | OK |
| hsa-miR-16-5p   | 0.981  | 35.962 | 35.660 | 0.302   | 12.513 | OK |
| hsa-miR-106a-5p |        |        |        |         |        | OK |
| hsa-miR-17-5p   | 0.271  | 0.671  | 0.961  | -0.289  | 0.257  |    |
| hsa-miR-181a-5p | 0.197  | 0.074  | 0.278  | -0.205  | 0.154  | OK |
| hsa-miR-181b-5p | 0.350  | 0.348  | 0.702  | -0.354  | 0.372  | OK |
| hsa-miR-182-5p  | 0.557  | 0.049  | 0.057  | -0.008  | 0.013  | OK |
| hsa-miR-183-5p  | 0.472  | 0.087  | 0.158  | -0.071  | 0.098  | OK |
| hsa-miR-185-5p  | 0.546  | 0.665  | 0.807  | -0.142  | 0.232  | OK |
| hsa-miR-18b-5p  | 0.221  | 0.066  | 0.136  | -0.070  | 0.056  | OK |
| hsa-miR-195-5p  | 0.815  | 21.246 | 23.161 | -1.915  | 8.088  | OK |
| hsa-miR-199a-5p | 0.468  | 0.125  | 0.224  | -0.099  | 0.135  | OK |

|                 |       |        |        |        |        |    |
|-----------------|-------|--------|--------|--------|--------|----|
| hsa-miR-206     | 0.688 | 0.372  | 0.562  | -0.190 | 0.468  | OK |
| hsa-miR-208a-3p | 0.216 | 0.124  | 0.744  | -0.620 | 0.489  | OK |
| hsa-miR-208b-3p | 0.235 | 0.315  | 1.898  | -1.583 | 1.302  | OK |
| hsa-miR-21-5p   | 0.612 | 25.854 | 29.057 | -3.203 | 6.238  | OK |
| hsa-miR-210-3p  | 0.246 | 0.113  | 0.468  | -0.356 | 0.299  | OK |
| hsa-miR-214-3p  | 0.372 | 0.142  | 0.349  | -0.207 | 0.227  | OK |
| hsa-miR-22-3p   | 0.264 | 1.374  | 3.510  | -2.136 | 1.870  | OK |
| hsa-miR-221-3p  | 0.511 | 0.950  | 0.732  | 0.217  | 0.327  | OK |
| hsa-miR-222-3p  | 0.255 | 2.249  | 8.470  | -6.221 | 5.343  | OK |
| hsa-miR-223-3p  | 0.062 | 56.946 | 26.302 | 30.644 | 15.706 | OK |
| hsa-miR-224-5p  | 0.928 | 0.236  | 0.248  | -0.012 | 0.132  | OK |
| hsa-miR-23a-3p  | 0.161 | 15.013 | 9.253  | 5.760  | 3.989  | OK |
| hsa-miR-23b-3p  | 0.263 | 1.686  | 1.148  | 0.538  | 0.470  | OK |
| hsa-miR-24-3p   | 0.295 | 1.646  | 1.111  | 0.535  | 0.501  | OK |
| hsa-miR-25-3p   | 0.496 | 20.753 | 26.764 | -6.011 | 8.704  | OK |
| hsa-miR-26a-5p  | 0.091 | 10.313 | 4.807  | 5.506  | 3.138  | OK |
| hsa-miR-26b-5p  | 0.191 | 4.372  | 2.318  | 2.054  | 1.532  | OK |
| hsa-miR-27a-3p  | 0.387 | 2.009  | 2.799  | -0.790 | 0.898  | OK |
| hsa-miR-27b-3p  | 0.566 | 0.896  | 1.116  | -0.220 | 0.379  | OK |
| hsa-miR-29a-3p  | 0.232 | 1.403  | 7.431  | -6.028 | 4.929  | OK |
| hsa-miR-29b-3p  | 0.385 | 0.364  | 0.276  | 0.088  | 0.100  | OK |
| hsa-miR-29c-3p  | 0.379 | 0.750  | 0.944  | -0.194 | 0.217  | OK |
| hsa-miR-302a-3p | 0.148 | 0.038  | 0.064  | -0.025 | 0.017  | OK |
| hsa-miR-302b-3p | 0.480 | 0.038  | 0.048  | -0.010 | 0.014  | A  |
| hsa-miR-30a-5p  | 0.887 | 1.920  | 1.835  | 0.086  | 0.596  | OK |

|                 |        |         |         |          |        |    |
|-----------------|--------|---------|---------|----------|--------|----|
| hsa-miR-30c-5p  | 0.202  | 1.093   | 0.673   | 0.419    | 0.320  | OK |
| hsa-miR-30d-5p  | 0.968  | 1.391   | 1.407   | -0.016   | 0.396  | OK |
| hsa-miR-30e-5p  | 0.226  | 3.123   | 13.015  | -9.892   | 7.985  | OK |
| hsa-miR-31-5p   | 0.232  | 0.286   | 1.602   | -1.316   | 1.077  | OK |
| hsa-miR-320a    | 0.324  | 3.157   | 4.287   | -1.130   | 1.125  | OK |
| hsa-miR-328-3p  | 0.294  | 0.850   | 2.092   | -1.242   | 1.159  | OK |
| hsa-miR-342-3p  | 0.261  | 1.769   | 1.273   | 0.495    | 0.431  | OK |
| hsa-miR-365a-3p | 0.123  | 0.166   | 0.453   | -0.287   | 0.180  | OK |
| hsa-miR-365b-3p |        |         |         |          |        | OK |
| hsa-miR-378a-3p | 0.002* | 0.064   | 0.116   | -0.051   | 0.015  | OK |
| hsa-miR-423-3p  | 0.545  | 0.188   | 0.158   | 0.031    | 0.050  | OK |
| hsa-miR-424-5p  | 0.288  | 0.851   | 1.166   | -0.315   | 0.291  | OK |
| hsa-miR-451a    | 0.724  | 123.802 | 141.105 | -17.303  | 48.495 | OK |
| hsa-miR-486-5p  | 0.085  | 127.445 | 240.608 | -113.163 | 63.155 | OK |
| hsa-miR-494-3p  | 0.769  | 0.054   | 0.050   | 0.004    | 0.014  | OK |
| hsa-miR-499a-5p | 0.469  | 0.038   | 0.048   | -0.010   | 0.013  | A  |
| hsa-miR-7-5p    | 0.629  | 0.366   | 0.438   | -0.072   | 0.148  | OK |
| hsa-miR-92a-3p  | 0.196  | 40.223  | 60.851  | -20.628  | 15.559 | OK |
| hsa-miR-93-5p   | 0.499  | 1.022   | 1.232   | -0.209   | 0.305  | OK |
| hsa-miR-98-5p   | 0.459  | 0.204   | 0.339   | -0.135   | 0.180  | OK |
| hsa-miR-99a-5p  | 0.159  | 0.190   | 0.303   | -0.113   | 0.078  | OK |

**Supplementary Table S4: Longitudinal miRNAs changes in non-responders group**

|                 | P<br>value | Mean of 6<br>Months | Mean of Basal | Difference | SE of difference | Quality |
|-----------------|------------|---------------------|---------------|------------|------------------|---------|
| hsa-let-7a-5p   | 0.835      | 6.505               | 5.647         | 0.858      | 3.975            | OK      |
| hsa-let-7b-5p   | 0.716      | 22.259              | 17.204        | 5.055      | 13.423           | OK      |
| hsa-let-7c-5p   | 0.976      | 1.388               | 1.418         | -0.030     | 0.970            | OK      |
| hsa-let-7d-5p   | 0.933      | 5.409               | 5.039         | 0.370      | 4.246            | OK      |
| hsa-let-7e-5p   | 0.915      | 2.816               | 3.031         | -0.214     | 1.947            | OK      |
| hsa-let-7f-5p   | 0.763      | 1.062               | 1.339         | -0.277     | 0.887            | OK      |
| hsa-miR-1-3p    | 0.095      | 0.051               | 0.132         | -0.080     | 0.043            | OK      |
| hsa-miR-100-5p  | 0.222      | 0.386               | 0.582         | -0.196     | 0.148            | OK      |
| hsa-miR-103a-3p | 0.574      | 0.146               | 0.240         | -0.094     | 0.161            | OK      |
| hsa-miR-107     | 0.173      | 0.058               | 0.114         | -0.055     | 0.037            | OK      |
| hsa-miR-10b-5p  | 0.526      | 0.079               | 0.093         | -0.014     | 0.021            | OK      |
| hsa-miR-122-5p  | 0.434      | 3.521               | 8.453         | -4.932     | 5.994            | OK      |
| hsa-miR-124-3p  | 0.294      | 0.078               | 0.140         | -0.062     | 0.055            | OK      |
| hsa-miR-125a-5p | 0.866      | 1.186               | 1.118         | 0.068      | 0.389            | OK      |
| hsa-miR-125b-5p | 0.237      | 0.221               | 0.421         | -0.200     | 0.157            | OK      |
| hsa-miR-126-3p  | 0.369      | 6.108               | 4.599         | 1.510      | 1.586            | OK      |
| hsa-miR-130a-3p | 0.608      | 0.425               | 0.283         | 0.143      | 0.268            | OK      |
| hsa-miR-133a-3p | 0.179      | 0.042               | 0.071         | -0.029     | 0.020            | A       |
| hsa-miR-133b    | 0.179      | 0.042               | 0.071         | -0.029     | 0.020            | A       |
| hsa-miR-140-5p  | 0.059      | 0.053               | 0.079         | -0.026     | 0.012            | OK      |
| hsa-miR-142-3p  | 0.888      | 0.165               | 0.171         | -0.006     | 0.042            | OK      |

|                 |       |        |        |        |        |    |
|-----------------|-------|--------|--------|--------|--------|----|
| hsa-miR-143-3p  | 0.165 | 0.051  | 0.078  | -0.026 | 0.017  | OK |
| hsa-miR-144-3p  | 0.822 | 0.186  | 0.215  | -0.029 | 0.125  | OK |
| hsa-miR-145-5p  | 0.132 | 0.126  | 0.253  | -0.127 | 0.076  | OK |
| hsa-miR-146a-5p | 0.214 | 1.271  | 0.770  | 0.502  | 0.372  | OK |
| hsa-miR-149-5p  | 0.179 | 0.042  | 0.071  | -0.029 | 0.020  | A  |
| hsa-miR-150-5p  | 0.083 | 9.981  | 5.537  | 4.444  | 2.246  | OK |
| hsa-miR-155-5p  | 0.194 | 0.056  | 0.081  | -0.025 | 0.017  | OK |
| hsa-miR-15b-5p  | 0.787 | 9.181  | 7.451  | 1.731  | 6.195  | OK |
| hsa-miR-16-5p   | 0.475 | 49.115 | 28.539 | 20.577 | 27.469 | OK |
| hsa-miR-106a-5p |       |        |        |        |        | OK |
| hsa-miR-17-5p   | 0.729 | 0.650  | 0.508  | 0.142  | 0.397  | OK |
| hsa-miR-181a-5p | 0.054 | 0.046  | 0.080  | -0.034 | 0.015  | OK |
| hsa-miR-181b-5p | 0.734 | 0.214  | 0.191  | 0.023  | 0.064  | OK |
| hsa-miR-182-5p  | 0.262 | 0.066  | 0.206  | -0.140 | 0.116  | OK |
| hsa-miR-183-5p  | 0.489 | 0.204  | 0.528  | -0.325 | 0.447  | OK |
| hsa-miR-185-5p  | 0.898 | 1.055  | 0.932  | 0.123  | 0.929  | OK |
| hsa-miR-18b-5p  | 0.121 | 0.060  | 0.089  | -0.029 | 0.017  | OK |
| hsa-miR-195-5p  | 0.763 | 28.371 | 22.703 | 5.668  | 18.183 | OK |
| hsa-miR-199a-5p | 0.133 | 0.042  | 0.073  | -0.031 | 0.019  | A  |
| hsa-miR-206     | 0.095 | 0.042  | 0.080  | -0.038 | 0.020  | OK |
| hsa-miR-208a-3p | 0.179 | 0.042  | 0.071  | -0.029 | 0.020  | A  |
| hsa-miR-208b-3p | 0.179 | 0.042  | 0.071  | -0.029 | 0.020  | A  |
| hsa-miR-21-5p   | 0.795 | 28.913 | 33.277 | -4.364 | 16.257 | OK |
| hsa-miR-210-3p  | 0.142 | 0.043  | 0.073  | -0.030 | 0.018  | OK |
| hsa-miR-214-3p  | 0.162 | 0.042  | 0.072  | -0.030 | 0.019  | OK |
| hsa-miR-22-3p   | 0.365 | 0.870  | 0.528  | 0.342  | 0.356  | OK |

|                 |       |        |        |        |        |    |
|-----------------|-------|--------|--------|--------|--------|----|
| hsa-miR-221-3p  | 0.199 | 0.798  | 0.457  | 0.340  | 0.243  | OK |
| hsa-miR-222-3p  | 0.135 | 1.183  | 0.601  | 0.582  | 0.350  | OK |
| hsa-miR-223-3p  | 0.111 | 46.015 | 22.707 | 23.308 | 13.022 | OK |
| hsa-miR-224-5p  | 0.356 | 0.096  | 0.075  | 0.021  | 0.022  | OK |
| hsa-miR-23a-3p  | 0.271 | 11.066 | 8.206  | 2.860  | 2.418  | OK |
| hsa-miR-23b-3p  | 0.340 | 1.340  | 1.031  | 0.309  | 0.305  | OK |
| hsa-miR-24-3p   | 0.265 | 1.113  | 0.749  | 0.364  | 0.304  | OK |
| hsa-miR-25-3p   | 0.328 | 37.101 | 16.071 | 21.030 | 20.206 | OK |
| hsa-miR-26a-5p  | 0.845 | 6.703  | 6.008  | 0.695  | 3.452  | OK |
| hsa-miR-26b-5p  | 0.891 | 3.627  | 4.004  | -0.377 | 2.673  | OK |
| hsa-miR-27a-3p  | 0.950 | 1.898  | 1.863  | 0.036  | 0.549  | OK |
| hsa-miR-27b-3p  | 0.695 | 0.793  | 0.952  | -0.160 | 0.393  | OK |
| hsa-miR-29a-3p  | 0.723 | 0.357  | 0.332  | 0.024  | 0.067  | OK |
| hsa-miR-29b-3p  | 0.780 | 0.391  | 0.498  | -0.107 | 0.370  | OK |
| hsa-miR-29c-3p  | 0.924 | 0.670  | 0.708  | -0.038 | 0.381  | OK |
| hsa-miR-302a-3p | 0.179 | 0.042  | 0.071  | -0.029 | 0.020  | A  |
| hsa-miR-302b-3p | 0.179 | 0.042  | 0.071  | -0.029 | 0.020  | A  |
| hsa-miR-30a-5p  | 0.527 | 1.814  | 1.332  | 0.482  | 0.729  | OK |
| hsa-miR-30c-5p  | 0.070 | 0.928  | 0.527  | 0.400  | 0.191  | OK |
| hsa-miR-30d-5p  | 0.473 | 1.284  | 0.890  | 0.394  | 0.524  | OK |
| hsa-miR-30e-5p  | 0.632 | 1.394  | 1.127  | 0.267  | 0.536  | OK |
| hsa-miR-31-5p   | 0.181 | 0.042  | 0.071  | -0.028 | 0.019  | A  |
| hsa-miR-320a    | 0.694 | 6.955  | 4.912  | 2.044  | 5.010  | OK |
| hsa-miR-328-3p  | 0.277 | 0.475  | 0.993  | -0.518 | 0.444  | OK |
| hsa-miR-342-3p  | 0.120 | 1.595  | 1.077  | 0.518  | 0.297  | OK |

|                 |       |         |         |        |         |    |
|-----------------|-------|---------|---------|--------|---------|----|
| hsa-miR-365a-3p |       |         |         |        |         |    |
| hsa-miR-365b-3p | 0.490 | 0.122   | 0.195   | -0.073 | 0.100   | OK |
| hsa-miR-378a-3p | 0.226 | 0.078   | 0.102   | -0.024 | 0.018   | OK |
| hsa-miR-423-3p  | 0.137 | 0.122   | 0.093   | 0.030  | 0.018   | OK |
| hsa-miR-424-5p  | 0.587 | 1.008   | 0.768   | 0.241  | 0.425   | OK |
| hsa-miR-451a    | 0.354 | 172.594 | 84.755  | 87.839 | 89.221  | OK |
| hsa-miR-486-5p  | 0.507 | 309.785 | 212.000 | 97.785 | 140.666 | OK |
| hsa-miR-494-3p  | 0.235 | 0.048   | 0.072   | -0.023 | 0.018   | OK |
| hsa-miR-499a-5p | 0.148 | 0.042   | 0.073   | -0.031 | 0.019   | A  |
| hsa-miR-7-5p    | 0.885 | 0.553   | 0.626   | -0.073 | 0.487   | OK |
| hsa-miR-92a-3p  | 0.328 | 72.371  | 38.815  | 33.556 | 32.235  | OK |
| hsa-miR-93-5p   | 0.467 | 1.503   | 0.843   | 0.660  | 0.865   | OK |
| hsa-miR-98-5p   | 0.943 | 0.095   | 0.097   | -0.002 | 0.024   | OK |
| hsa-miR-99a-5p  | 0.236 | 0.191   | 0.277   | -0.086 | 0.067   | OK |

A: This gene's average threshold cycle is relatively high ( $> 30$ ) in either the control or the test sample, and is reasonably low in the other sample ( $< 30$ ).

These data mean that the gene's expression is relatively low in one sample and reasonably detected in the other sample suggesting that the actual fold-change value is at least as large as the calculated and reported fold-change result.

This fold-change result may also have greater variations if p value  $> 0.05$ ; therefore, it is important to have a sufficient number of biological replicates to validate the result for this gene.

B: This gene's average threshold cycle is relatively high ( $> 30$ ), meaning that its relative expression level is low, in both control and test samples, and the p-value for the fold-change is either unavailable or relatively high (p  $> 0.05$ ).

This fold-change result may also have greater variations; therefore, it is important to have a sufficient number of biological replicates to validate the result for this gene.

**Supplementary Table S5: AUC values of basal altered miRNAs expression in responders vs non-responders.**

|                 | Area  | Std. Error | 95% C.I.       | P value |
|-----------------|-------|------------|----------------|---------|
| hsa-miR-107     | 0.740 | 0.101      | 0.543 to 0.937 | 0.043*  |
| hsa-miR-302b-3p | 0.727 | 0.109      | 0.515 to 0.940 | 0.055   |
| hsa-miR-499a-5p | 0.747 | 0.106      | 0.540 to 0.954 | 0.037*  |

**Supplementary Table S6: AUC values of longitudinal altered miRNAs expression in responders**

|                 | Area  | Std. Error | 95% C.I.       | P value |
|-----------------|-------|------------|----------------|---------|
| hsa-miR-125b-5p | 0.735 | 0.097      | 0.546 to 0.924 | 0.035*  |
| hsa-miR-130a-3p | 0.699 | 0.109      | 0.486 to 0.912 | 0.073   |
| hsa-miR-378a-3p | 0.816 | 0.083      | 0.654 to 0.979 | 0.004*  |

**Supplementary Table S7: Sensitivity and Specificity of basal altered miRNAs expression in responders vs non-responders.**

|                 | Sensitivity % | 95% CI           | Specificity % | 95% CI           |
|-----------------|---------------|------------------|---------------|------------------|
| hsa-miR-107     | 63.64         | 35.38% to 84.83% | 78.57         | 52.41% to 92.43% |
| hsa-miR-302b-3p | 64.29         | 38.76% to 83.66% | 81.82         | 52.30% to 96.77% |
| hsa-miR-499a-5p | 54.55         | 28.01% to 78.73% | 85.71         | 60.06% to 97.46% |



**Supplementary Table S8: Sensitivity and Specificity of longitudinal altered miRNAs expression in responders**

|                 | Sensitivity % | 95% CI           | Specificity % | 95% CI           |
|-----------------|---------------|------------------|---------------|------------------|
| hsa-miR-125b-5p | 42.86         | 21.38% to 67.41% | 92.86         | 68.53% to 99.63% |
| hsa-miR-130a-3p | 100.0         | 78.47% to 100.0% | 57.14         | 32.59% to 78.62% |
| hsa-miR-378a-3p | 57.14         | 28.86% to 82.34% | 85.71         | 57.19% to 98.22% |

**Supplementary Table S9: Basal Real-time RT-PCR cycle threshold (Ct) values of 84 cardio-miRs in responder patients**

| miRNA ID        | Responders Baseline |          |          |          |          |          |          |          |          |          |          |          |          |          |
|-----------------|---------------------|----------|----------|----------|----------|----------|----------|----------|----------|----------|----------|----------|----------|----------|
|                 | 1                   | 2        | 3        | 4        | 5        | 6        | 7        | 8        | 9        | 10       | 11       | 12       | 13       | 14       |
| hsa-let-7a-5p   | 19.84191            | 20.0035  | 21.78521 | 18.33104 | 26.02479 | 24.92978 | 24.62279 | 22.74035 | 26.38322 | 22.14805 | 24.46670 | 23.45431 | 19.36229 | 27.37305 |
| hsa-let-7b-5p   | 19.88526            | 19.71372 | 19.01192 | 17.89871 | 25.64895 | 22.02559 | 21.97262 | 20.59451 | 23.67828 | 20.22782 | 22.88947 | 20.55793 | 16.79912 | 25.52193 |
| hsa-let-7c-5p   | 19.42285            | 19.34845 | 23.25462 | 21.59233 | 28.54032 | 27.13652 | 26.08209 | 24.78808 | 28.01401 | 23.50439 | 26.30528 | 25.20018 | 21.16009 | 27.13247 |
| hsa-let-7d-5p   | 19.23731            | 19.24346 | 21.22658 | 19.33075 | 26.07455 | 23.8795  | 23.54721 | 22.74017 | 25.58212 | 22.20951 | 24.79937 | 22.42504 | 19.6998  | 29.19573 |
| hsa-let-7e-5p   | 30.01877            | 30.87293 | 22.0803  | 19.52586 | 27.19405 | 26.08417 | 25.75033 | 23.77848 | 27.45049 | 23.03729 | 25.63599 | 24.65787 | 20.31588 | 27.48568 |
| hsa-let-7f-5p   | 28.59197            | 30.27145 | 23.96519 | 20.01565 | 28.40646 | 27.41692 | 27.02485 | 25.28643 | 29.77111 | 24.87944 | 26.80365 | 26.94757 | 22.49457 | 30.02407 |
| hsa-miR-1-3p    | 26.15889            | 29.13614 | 25.96546 | 23.85659 | 32.81236 | 31.96589 | 30.9774  | 27.50269 | 32.68694 | 25.50664 | 28.60281 | 29.34673 | 28.78388 | -        |
| hsa-miR-100-5p  | -                   | 36.48434 | 22.98689 | 21.09347 | 27.96393 | 28.5202  | 26.95949 | 24.34313 | 27.57453 | 23.67261 | 25.65108 | 26.96597 | 24.95645 | 30.38845 |
| hsa-miR-103a-3p | 27.88747            | 31.53689 | 26.01816 | 21.52744 | 29.43791 | 28.2178  | 28.67173 | 27.24687 | 29.62132 | 28.26304 | 30.13565 | 28.16726 | 25.21449 | 35.01258 |
| hsa-miR-107     | 30.19726            | 30.65397 | 28.84723 | 24.41639 | 32.49769 | 30.7644  | 30.98152 | 29.72545 | 31.47517 | 31.53936 | 32.28994 | 31.18333 | 27.01526 | -        |
| hsa-miR-10b-5p  | -                   | 38.24860 | 25.50524 | 24.80085 | 30.42347 | 31.37139 | 30.71275 | 27.01854 | 31.05729 | 26.71885 | 31.88744 | 29.93233 | 28.69667 | 35.20304 |
| hsa-miR-122-5p  | 38.46095            | 38.79723 | 19.82414 | 20.24732 | 27.94337 | 27.36003 | 24.27572 | 22.34441 | 26.16295 | 18.39364 | 22.98630 | 25.86515 | 22.66536 | 29.1467  |
| hsa-miR-124-3p  | 24.74027            | 26.09708 | 28.75962 | 28.02841 | 29.57519 | 29.41669 | 30.36493 | 30.54312 | 31.11117 | 30.38575 | 29.47168 | 29.94108 | 29.28939 | 29.86893 |
| hsa-miR-125a-5p | 25.28661            | 26.98355 | 21.82751 | 20.35802 | 27.48086 | 27.751   | 26.07017 | 23.03413 | 26.31552 | 22.68647 | 25.21437 | 25.23791 | 23.29496 | 27.36829 |
| hsa-miR-125b-5p | 21.68091            | 22.39346 | 23.69135 | 21.86540 | 28.71359 | 29.83724 | 27.2047  | 24.82085 | 28.30634 | 23.63028 | 26.40038 | 27.52872 | 25.20829 | 30.44353 |

|                 |          |          |          |          |          |          |          |          |          |          |          |          |          |          |
|-----------------|----------|----------|----------|----------|----------|----------|----------|----------|----------|----------|----------|----------|----------|----------|
| hsa-miR-126-3p  | 16.78427 | 17.36069 | 19.5423  | 17.25346 | 25.06231 | 25.1079  | 23.61317 | 20.80079 | 25.11842 | 21.19662 | 22.86982 | 22.83431 | 20.95471 | 27.4782  |
| hsa-miR-130a-3p | 23.49839 | 24.31251 | 24.29385 | 21.78262 | 29.40453 | 27.13161 | 26.03007 | 24.75671 | 29.28528 | 26.54833 | 28.53514 | 25.57723 | 22.67745 | 35.27981 |
| hsa-miR-133a-3p | 31.45377 | 31.44252 | 32.23641 | 30.95988 | 36.57259 | -        | -        | 36.71846 | -        | 34.46545 | 34.93331 | -        | -        | -        |
| hsa-miR-133b    | 27.76724 | 29.76323 | 32.98231 | 30.62265 | -        | -        | -        | 34.63663 | -        | 35.66105 | -        | 34.53553 | -        | -        |
| hsa-miR-140-5p  | 15.02599 | 15.80897 | 28.06902 | 25.20641 | -        | 32.42005 | 32.58796 | 28.22155 | 32.36642 | 29.60947 | 31.19728 | 30.57054 | 28.65279 | -        |
| hsa-miR-142-3p  | 14.68078 | 14.99658 | 24.59681 | 20.26462 | 29.05801 | 29.92316 | 28.2914  | 25.88765 | 29.09242 | 25.67191 | 28.20863 | 28.368   | 28.9574  | 33.64798 |
| hsa-miR-143-3p  | 22.34199 | 22.96559 | 27.80805 | 24.6336  | -        | 33.39125 | 30.19004 | 27.62456 | 34.62107 | 28.21034 | 29.68711 | 29.34372 | 31.86693 | 36.1478  |
| hsa-miR-144-3p  | 24.76432 | 25.8177  | 23.90718 | 21.48969 | 31.45402 | 27.1004  | 27.18943 | 25.52481 | 29.30063 | 26.4857  | 29.44157 | 26.42274 | 26.36722 | 35.26258 |
| hsa-miR-145-5p  | 26.13858 | 27.24134 | 26.55052 | 22.32615 | 27.58484 | 27.97082 | 27.63689 | 26.87873 | 28.48023 | 27.28841 | 28.25653 | 27.49449 | 28.17701 | 31.43414 |
| hsa-miR-146a-5p | 24.94755 | 26.37954 | 22.7501  | 19.18675 | 27.2261  | 26.57445 | 27.17826 | 23.78733 | 27.2079  | 24.05903 | 25.19818 | 24.97361 | 24.10233 | 30.14289 |
| hsa-miR-149-5p  | 21.70731 | 23.16448 | 35.89579 | 34.28728 | -        | 35.06697 | 36.10102 | -        | -        | 36.60941 | -        | 36.06864 | -        | -        |
| hsa-miR-150-5p  | 25.56588 | 25.18984 | 18.85218 | 18.48367 | 25.41242 | 24.02359 | 23.94691 | 21.05849 | 23.11858 | 20.05791 | 24.91524 | 23.08326 | 19.24954 | 27.04442 |
| hsa-miR-155-5p  | 20.45612 | 21.73005 | 28.3755  | 25.93137 | 34.79484 | 33.69769 | 30.90395 | 30.78849 | 33.15408 | 28.94461 | 32.66084 | 32.91734 | 28.28863 | 33.0918  |
| hsa-miR-15b-5p  | 31.53004 | 32.45306 | 21.18054 | 18.06867 | 25.05935 | 23.47934 | 22.88169 | 21.88479 | 25.2736  | 21.6461  | 23.37335 | 21.93324 | 19.19765 | 27.96061 |
| hsa-miR-16-5p   | 21.38821 | 22.34719 | 18.2124  | 16.48274 | 23.93932 | 21.50247 | 20.1279  | 18.09906 | 22.49489 | 19.30497 | 21.34988 | 18.42423 | 16.75351 | 27.55341 |
| hsa-miR-106a-5p | 21.44151 | 22.65983 | 23.26455 | 20.78955 | 28.6114  | 27.46397 | 26.00477 | 24.76833 | 28.0327  | 24.90981 | 27.63202 | 25.05266 | 23.38988 | 31.44881 |
| hsa-miR-17-5p   | 22.06775 | 23.23176 | 29.40321 | 25.44801 | 33.24712 | 31.66862 | 34.48433 | 31.72371 | 31.53551 | 30.31976 | 32.63215 | 32.23122 | 28.8564  | 35.96242 |
| hsa-miR-181a-5p | 20.99444 | 21.99187 | 24.35049 | 23.61367 | 31.53049 | 28.70047 | 28.52634 | 26.53133 | 28.69124 | 26.00384 | 28.60162 | 27.39987 | 25.64961 | 31.42443 |
| hsa-miR-182-5p  | 33.91987 | 33.99507 | 28.70471 | 25.77531 | 31.15103 | 33.3937  | 31.14518 | 30.49488 | 32.85178 | 29.25071 | 31.20394 | 31.98878 | 26.74165 | -        |
| hsa-miR-183-5p  | 35.9649  | -        | 27.87576 | 26.94693 | 32.92858 | 34.1241  | 30.9359  | 28.23702 | 31.71801 | 28.32008 | 32.55724 | 28.7249  | 23.00968 | 32.87954 |
| hsa-miR-185-5p  | 22.41039 | 23.20716 | 23.01648 | 20.95054 | 30.04265 | 27.33813 | 25.97054 | 24.98705 | 28.04057 | 24.49253 | 27.96551 | 24.93134 | 23.74715 | -        |
| hsa-miR-18b-5p  | 23.4579  | 24.64703 | 29.94412 | 25.83877 | 30.99129 | 29.79868 | 34.26055 | 30.57401 | 32.13649 | 30.41582 | 30.01932 | 29.7431  | 28.5822  | 35.04238 |
| hsa-miR-195-5p  | 23.49493 | 24.80106 | 18.88162 | 17.15051 | 24.74492 | 22.14992 | 20.60106 | 18.68317 | 23.25022 | 20.19385 | 21.91696 | 19.0956  | 17.2327  | 28.46631 |
| hsa-miR-199a-5p | 22.4414  | 23.73414 | 29.99424 | 24.32582 | 31.85142 | -        | 33.85891 | 29.78487 | -        | 31.90337 | -        | 32.26897 | 30.98636 | 35.92517 |
| hsa-miR-206     | 20.98006 | 22.02368 | 27.63244 | 26.28068 | 31.91676 | 30.45434 | 29.90372 | 28.71449 | 33.39438 | 29.33521 | 28.98229 | 30.27145 | 30.1795  | 33.17344 |
| hsa-miR-208a-3p | 20.32714 | 21.79168 | 35.83442 | 36.06089 | -        | -        | -        | -        | 33.95532 | -        | -        | -        | -        | -        |
| hsa-miR-208b-3p | 18.9491  | 20.34879 | 31.40434 | 32.51118 | -        | 35.52602 | 34.51469 | 31.27713 | -        | 32.20971 | -        | -        | -        | -        |

|                 |          |          |          |          |          |          |          |          |          |          |          |          |          |          |
|-----------------|----------|----------|----------|----------|----------|----------|----------|----------|----------|----------|----------|----------|----------|----------|
| hsa-miR-21-5p   | 18.14406 | 18.97987 | 18.00975 | 15.60474 | 23.37229 | 21.59003 | 21.71637 | 19.66512 | 22.66956 | 18.6676  | 20.66750 | 20.53789 | 17.96542 | 25.28289 |
| hsa-miR-210-3p  | 21.06117 | 22.49526 | 31.07907 | 28.24881 | 32.06826 | 31.46582 | 32.10699 | 30.83752 | 32.50336 | 30.21895 | 30.82009 | 33.35324 | 30.18008 | 31.49533 |
| hsa-miR-214-3p  | 21.62971 | 22.85815 | 29.42631 | 28.15084 | 32.09974 | -        | 32.15071 | 30.32936 | -        | 29.47375 | 33.24553 | 32.72726 | 33.29314 | 34.40918 |
| hsa-miR-22-3p   | 18.36045 | 20.03364 | 22.31653 | 21.16313 | 28.82558 | 25.21818 | 25.5744  | 23.3336  | 27.06451 | 24.7162  | 26.41494 | 24.49241 | 24.56397 | 36.11221 |
| hsa-miR-221-3p  | 25.14719 | 25.83372 | 23.77501 | 19.80911 | 27.97625 | 26.62608 | 26.98913 | 24.53132 | 28.01094 | 25.54527 | 25.82673 | 25.24319 | 24.53567 | 32.88506 |
| hsa-miR-222-3p  | 16.84674 | 18.41407 | 22.4975  | 20.64586 | 28.12877 | 26.1463  | 26.14159 | 23.73565 | 27.03469 | 24.34161 | 25.86304 | 25.09861 | 23.78974 | 30.8611  |
| hsa-miR-223-3p  | 22.02249 | 23.00664 | 18.97785 | 15.04457 | 22.90857 | 22.88433 | 21.65954 | 19.55541 | 22.92089 | 19.16157 | 21.08635 | 20.60537 | 17.12063 | 24.60914 |
| hsa-miR-224-5p  | 22.33131 | 23.78264 | 28.42504 | 24.29805 | 31.11204 | 30.11805 | 31.05645 | 27.93089 | 30.0905  | 28.79813 | 30.38456 | 28.04324 | 27.41167 | 31.66068 |
| hsa-miR-23a-3p  | 22.13383 | 23.13215 | 19.74043 | 16.65263 | 24.10624 | 23.804   | 22.86187 | 20.86743 | 23.94379 | 20.43876 | 22.02120 | 21.93121 | 20.37003 | 25.876   |
| hsa-miR-23b-3p  | 29.27188 | 30.21341 | 22.27318 | 20.20253 | 26.7926  | 26.11194 | 25.79623 | 23.85543 | 27.04272 | 22.98634 | 25.30584 | 25.03204 | 23.48955 | 29.21096 |
| hsa-miR-24-3p   | 30.43063 | 30.88632 | 22.59534 | 19.66596 | 27.06186 | 27.0001  | 25.75985 | 23.69747 | 27.24778 | 23.6154  | 24.96817 | 24.69759 | 23.86565 | 31.29105 |
| hsa-miR-25-3p   | 17.91409 | 19.06775 | 18.69221 | 18.12583 | 24.50082 | 22.11332 | 20.83778 | 19.83701 | 22.46482 | 19.64668 | 22.59748 | 19.89317 | 16.56706 | 26.26348 |
| hsa-miR-26a-5p  | 35.80273 | 34.92135 | 20.4379  | 17.10811 | 24.87404 | 24.93596 | 23.94559 | 21.98698 | 25.17189 | 21.74973 | 24.08385 | 23.47675 | 20.72902 | 27.76607 |
| hsa-miR-26b-5p  | -        | 35.17791 | 21.56231 | 18.17565 | 26.93649 | 26.21146 | 25.64935 | 23.52712 | 26.52334 | 22.82048 | 25.36018 | 24.79397 | 20.79751 | 28.72496 |
| hsa-miR-27a-3p  | 27.7078  | 29.56584 | 20.65573 | 18.36308 | 26.64284 | 25.95812 | 24.76007 | 21.83958 | 25.82593 | 21.95552 | 24.22320 | 24.18883 | 23.32488 | 29.99447 |
| hsa-miR-27b-3p  | 26.78743 | 29.95699 | 22.22773 | 19.95207 | 27.64341 | 27.94409 | 26.19835 | 23.76239 | 27.75556 | 22.34634 | 25.41401 | 25.3832  | 24.68736 | 30.90149 |
| hsa-miR-29a-3p  | 17.62799 | 17.86415 | 22.91406 | 21.54144 | 29.14391 | 28.90747 | 27.1875  | 24.83515 | 28.43591 | 24.39931 | 27.03975 | 26.85672 | 25.93566 | 31.56988 |
| hsa-miR-29b-3p  | 28.04684 | 29.28477 | 24.54293 | 22.42576 | 31.29731 | 29.79417 | 27.38745 | 26.17487 | 29.48786 | 25.63511 | 28.34858 | 25.98013 | 24.14673 | 34.84656 |
| hsa-miR-29c-3p  | 22.19613 | 23.82256 | 22.57417 | 20.72662 | 28.73598 | 28.26199 | 25.90235 | 23.89878 | 27.77225 | 23.79477 | 26.67847 | 25.17364 | 23.83439 | 32.6746  |
| hsa-miR-302a-3p | 26.18324 | 26.14338 | 36.12545 | 31.9296  | -        | -        | -        | -        | -        | 33.62856 | 32.20512 | -        | -        | -        |
| hsa-miR-302b-3p | 28.22818 | 28.33616 | -        | 33.53281 | 38.6248  | -        | -        | -        | -        | 36.59692 | 36.46421 | -        | 35.77745 | -        |
| hsa-miR-30a-5p  | 24.37608 | 26.04666 | 21.70911 | 19.16714 | 27.51054 | 26.24777 | 25.5436  | 22.69412 | 26.48641 | 22.93262 | 25.12290 | 24.05621 | 21.7871  | 31.48616 |
| hsa-miR-30c-5p  | 26.93115 | 29.39772 | 23.19785 | 20.11044 | 27.771   | 27.1657  | 26.33229 | 24.65734 | 27.77622 | 24.91205 | 26.60770 | 26.32274 | 23.89086 | 32.25084 |
| hsa-miR-30d-5p  | 22.51675 | 23.85957 | 22.34905 | 19.81882 | 27.64244 | 26.74527 | 25.86554 | 23.27111 | 26.94595 | 23.55762 | 25.92150 | 24.3739  | 22.09857 | 32.70195 |
| hsa-miR-30e-5p  | 16.75027 | 17.23229 | 21.91257 | 19.60997 | 27.84048 | 26.46659 | 25.80032 | 23.08204 | 26.89488 | 23.19162 | 25.48366 | 24.32066 | 22.40355 | 31.06473 |
| hsa-miR-31-5p   | 19.47827 | 20.27329 | 32.46037 | 31.10894 | 35.56205 | 32.3735  | 32.99335 | 31.94077 | 33.2868  | 31.6359  | 34.30622 | 34.19646 | 31.99502 | 32.18044 |
| hsa-miR-320a    | 27.81806 | 28.51754 | 20.50435 | 19.24573 | 26.16527 | 23.52576 | 23.71193 | 22.13495 | 24.07446 | 21.64691 | 24.74474 | 22.79476 | 19.86958 | 29.37034 |

|                    |          |          |          |          |          |          |          |          |          |          |          |          |          |          |
|--------------------|----------|----------|----------|----------|----------|----------|----------|----------|----------|----------|----------|----------|----------|----------|
| hsa-miR-328-3p     | 19.03453 | 20.96022 | 25.88325 | 23.97241 | 28.09706 | 26.43894 | 27.7276  | 27.25989 | 28.12236 | 26.82253 | 27.15777 | 28.02489 | 25.15286 | 25.06053 |
| hsa-miR-342-3p     | -        | 32.94544 | 21.89783 | 20.71504 | 27.09028 | 26.10258 | 25.70812 | 23.88413 | 26.41371 | 22.67694 | 26.45754 | 24.73621 | 22.26271 | 29.14152 |
| hsa-miR-365a-3p    |          |          |          |          |          |          |          |          |          |          |          |          |          |          |
| hsa-miR-365b-3p    | 21.73532 | 23.34527 | 24.51941 | 23.99055 | 30.50763 | 31.18228 | 29.11903 | 26.23175 | 30.01678 | 24.29078 | 28.41197 | 29.03189 | 27.43387 | -        |
| hsa-miR-378a-3p    | 25.59985 | 26.09543 | 25.9239  | 24.61909 | 32.66703 | 30.11341 | 28.98842 | 27.46117 | 30.37235 | 27.44928 | 31.85860 | 28.11501 | 27.99808 | -        |
| hsa-miR-423-3p     | 24.55052 | 25.09448 | 26.17591 | 23.11901 | 30.74596 | 28.88722 | 29.11455 | 27.66664 | 29.85272 | 28.26161 | 30.18772 | 28.52233 | 26.85224 | 33.9571  |
| hsa-miR-424-5p     | 26.53323 | 26.99322 | 22.01997 | 21.03025 | 27.83872 | 25.94928 | 24.92384 | 23.20911 | 26.34507 | 23.52522 | 25.88857 | 24.35336 | 23.4445  | 32.5754  |
| hsa-miR-451a       | 23.75702 | 24.72434 | 15.18877 | 13.83141 | 22.30174 | 19.38697 | 18.38535 | 16.16323 | 20.64807 | 17.22226 | 19.72102 | 16.75515 | 15.28198 | 26.1818  |
| hsa-miR-486-5p     | 27.08547 | 27.63122 | 14.79736 | 15.28224 | 20.82048 | 16.63221 | 17.25022 | 16.84194 | 17.88499 | 16.71562 | 19.51172 | 16.49862 | 14.35624 | 22.17513 |
| hsa-miR-494-3p     | 33.98846 | 39.28199 | 30.16243 | 25.25605 | 31.43753 | 32.79103 | 30.9574  | 34.0424  | 34.41611 | 30.00187 | 30.25745 | 29.83684 | 29.85147 | 36.16228 |
| hsa-miR-499a-5p    | 35.35032 | 34.1583  | 28.81025 | 27.98655 | 37.55873 | 35.00038 | 34.27072 | 29.55111 | 34.11559 | 29.10333 | 33.50202 | 34.0736  | 32.94487 | -        |
| hsa-miR-7-5p       | 23.65496 | 24.32796 | 24.84278 | 24.24265 | 29.40058 | 29.07302 | 27.95275 | 25.29252 | 29.29155 | 25.27816 | 28.97482 | 26.4129  | 22.4848  | 30.96707 |
| hsa-miR-92a-3p     | 18.9827  | 20.25777 | 16.65834 | 16.71164 | 22.76011 | 20.11454 | 19.2554  | 18.3018  | 20.05514 | 18.45877 | 21.29853 | 18.46733 | 15.91632 | 25.47392 |
| hsa-miR-93-5p      | 24.00928 | 24.98227 | 22.52898 | 20.69374 | 27.84538 | 25.65887 | 24.99172 | 23.83352 | 26.77845 | 24.22874 | 26.84008 | 23.77476 | 21.94543 | 34.85024 |
| hsa-miR-98-5p      | 21.99079 | 22.93133 | 27.82218 | 23.19121 | 30.92509 | 31.04847 | 30.71481 | 28.41908 | 32.20228 | 28.35761 | 29.66981 | 30.59597 | 27.46395 | 35.0232  |
| hsa-miR-99a-5p     | 29.02829 | 29.06496 | 23.97277 | 22.16447 | 28.85898 | 29.75753 | 27.73792 | 25.37887 | 29.0693  | 24.84456 | 26.81895 | 28.192   | 26.02437 | 31.81341 |
| SNORD61            | 27.63758 | 28.80558 | 29.03048 | 26.59955 | 34.42818 | 31.13966 | 32.78331 | 30.331   | 31.68502 | 29.37387 | 32.00511 | 34.18114 | 30.34297 | 36.25198 |
| SNORD68            | 24.32069 | 25.7618  | 26.85148 | 24.28254 | 31.53528 | 34.11323 | 32.674   | 29.58427 | 34.61507 | 27.80394 | -        | 31.26811 | 27.93411 | -        |
| SNORD72            | 23.34288 | 25.02406 | 36.19455 | 34.44434 | 37.41567 | 38.38386 | -        | -        | -        | -        | -        | -        | 38.15257 | -        |
| SNORD95            | 26.30938 | 27.5625  | 26.03077 | 23.91937 | 31.1936  | 30.10253 | 30.97837 | 28.28977 | 29.99331 | 27.81444 | 30.53891 | 29.41245 | 25.60467 | -        |
| SNORD96A           | 22.37372 | 24.13906 | 27.79684 | 25.94733 | -        | 34.00454 | -        | 30.09497 | 29.39889 | 29.29656 | 32.04503 | 33.27823 | 26.803   | 35.04143 |
| RNU6-6P            | 21.58214 | 22.75565 | 29.57277 | 26.12281 | 30.47095 | 30.59433 | -        | 31.17407 | 31.86222 | 30.62344 | 32.49541 | -        | 30.34327 | -        |
| miRTC <sup>a</sup> | 20.6421  | 21.53689 | 18.75702 | 18.4029  | 19.07549 | 19.10357 | 19.28181 | 19.05362 | 19.86876 | 19.35296 | 19.11680 | 19.51311 | 21.37097 | 24.04655 |
| miRTC <sup>a</sup> | 22.91082 | 23.47966 | 18.7177  | 18.51817 | 19.05131 | 19.03902 | 19.1266  | 19.06144 | 19.77307 | 19.2812  | 19.31367 | 19.6554  | 21.41609 | 24.01066 |
| PPC <sup>b</sup>   | 18.81057 | 19.22936 | 19.64822 | 19.88891 | 20.00624 | 19.84029 | 20.07975 | 19.66761 | 19.93348 | 19.69929 | 20.12112 | 20.03439 | 20.09547 | 20.60515 |
| PPC <sup>b</sup>   | 20.48571 | 21.76894 | 19.7457  | 20.14518 | 19.9891  | 19.97297 | 19.82986 | 19.96308 | 19.94862 | 19.97094 | 19.82953 | 19.99724 | 19.98593 | 20.51843 |

<sup>a</sup>miRTC: miRNA reverse transcription control miScript Primer Assay

<sup>b</sup>PPC: Positive PCR control

**Supplementary Table S10: Longitudinal Real-time RT-PCR cycle threshold (Ct) values of 84 cardio-miRs in responder patients**

| miRNA ID        | Responders 6 Months |          |          |          |          |          |          |          |          |          |          |          |          |          |
|-----------------|---------------------|----------|----------|----------|----------|----------|----------|----------|----------|----------|----------|----------|----------|----------|
|                 | 1                   | 2        | 3        | 4        | 5        | 6        | 7        | 8        | 9        | 10       | 11       | 12       | 13       | 14       |
| hsa-let-7a-5p   | 19.93017            | 19.93011 | 22.78725 | 20.32926 | 23.09488 | 23.97471 | 20.13568 | 24.93199 | 18.18389 | 23.98955 | 23.94663 | 22.4442  | 24.12062 | 25.31159 |
| hsa-let-7b-5p   | 19.83429            | 19.95703 | 20.11079 | 19.90862 | 21.95568 | 21.64418 | 18.65608 | 23.44397 | 17.49196 | 21.65863 | 22.49703 | 19.32737 | 22.16759 | 23.95952 |
| hsa-let-7c-5p   | 19.60794            | 22.29036 | 24.54212 | 23.80125 | 25.35441 | 26.10497 | 22.28011 | 27.46947 | 20.71601 | 25.79901 | 26.77693 | 23.99708 | 26.09353 | 27.55942 |
| hsa-let-7d-5p   | 18.95534            | 22.36619 | 22.3888  | 20.47298 | 22.91474 | 24.44578 | 19.69541 | 24.65251 | 19.01866 | 23.71139 | 23.91538 | 21.92411 | 25.31337 | 25.48794 |
| hsa-let-7e-5p   | 31.21359            | -        | 23.98442 | 21.84344 | 24.31791 | 25.29718 | 20.6571  | 26.34134 | 19.28378 | 25.3658  | 24.97085 | 23.6471  | 24.98702 | 25.97999 |
| hsa-let-7f-5p   | 30.88454            | 32.26915 | 25.45784 | 22.58489 | 25.17632 | 26.77902 | 21.5689  | 27.17022 | 19.53549 | 26.66564 | 25.93347 | 25.88668 | 26.4605  | 27.97553 |
| hsa-miR-1-3p    | 28.14775            | 30.36403 | 29.82095 | 27.70556 | 30.16509 | 31.83696 | 24.78352 | 31.78098 | 24.33529 | 30.49525 | 29.90890 | 30.83147 | 32.76384 | 30.1259  |
| hsa-miR-100-5p  | -                   | -        | 25.67687 | 23.97522 | 25.80443 | 26.96623 | 23.05364 | 27.79986 | 23.13535 | 26.61417 | 26.96769 | 25.89462 | 28.53353 | 28.30471 |
| hsa-miR-103a-3p | 29.21449            | 32.94072 | 27.62163 | 25.66474 | 26.12881 | 29.09419 | 23.43541 | 29.07121 | 23.88089 | 28.32657 | 29.77333 | 27.12953 | 30.3893  | 29.71575 |
| hsa-miR-107     | 29.91138            | 33.73687 | 31.74035 | 29.54726 | 30.33554 | 31.87339 | 26.4868  | 32.82658 | 26.10708 | 31.7825  | 30.97189 | 30.7459  | 32.8028  | 32.24168 |
| hsa-miR-10b-5p  | -                   | 39.01448 | 28.12613 | 26.96309 | 30.00126 | 30.55687 | 26.99089 | 29.56714 | 26.00351 | 29.21344 | 31.65527 | 29.39976 | 30.57792 | 31.11409 |
| hsa-miR-122-5p  | 35.163              | -        | 21.10832 | 23.18134 | 26.46167 | 23.5958  | 20.06155 | 26.55157 | 21.63254 | 22.08557 | 24.67635 | 23.43155 | 24.99981 | 26.2295  |
| hsa-miR-124-3p  | 25.86868            | 31.0516  | 28.98376 | 29.34979 | 29.55179 | 29.06952 | 29.61445 | 30.19957 | 27.79464 | 30.22184 | 29.23860 | 30.1013  | 29.74442 | 29.49319 |
| hsa-miR-125a-5p | 29.54444            | 33.89471 | 23.9888  | 22.23159 | 23.8978  | 26.09452 | 20.46884 | 26.12578 | 21.37054 | 25.95624 | 25.68563 | 23.70782 | 26.45071 | 26.91657 |
| hsa-miR-125b-5p | 24.10437            | 34.61625 | 26.59994 | 26.44754 | 26.38152 | 28.49526 | 23.96954 | 29.25108 | 24.0705  | 27.03002 | 28.98349 | 25.66426 | 29.48713 | 29.96062 |
| hsa-miR-126-3p  | 17.36413            | 23.79737 | 22.0737  | 20.55354 | 21.3618  | 23.74145 | 18.3483  | 23.09809 | 18.27686 | 22.5673  | 22.50283 | 21.55562 | 24.87621 | 24.80891 |
| hsa-miR-130a-3p | 25.72138            | 31.85089 | 26.51933 | 26.33721 | 26.32544 | 27.90115 | 23.40592 | 27.51737 | 23.10896 | 26.72094 | 28.10915 | 25.17505 | 28.64093 | 30.18002 |
| hsa-miR-133a-3p | 30.39383            | 35.56599 | 33.96691 | 35.94566 | 33.95176 | -        | 36.57546 | -        | 33.07064 | 35.19397 | 35.31496 | 35.17661 | -        | 35.53863 |
| hsa-miR-133b    | 31.95796            | 33.74579 | 35.63522 | 35.98869 | 36.68855 | -        | 35.19523 | -        | 32.6754  | -        | -        | -        | 35.69682 | 34.90822 |
| hsa-miR-140-5p  | 15.07702            | 19.90829 | 30.12058 | 29.22608 | 29.06691 | 31.40444 | 26.33226 | 31.32969 | 25.29692 | 29.82215 | 30.55678 | 28.98363 | 33.50126 | 32.9315  |
| hsa-miR-142-3p  | 17.71025            | 27.01809 | 27.77753 | 26.29296 | 26.16684 | 29.24478 | 22.9935  | 27.13976 | 22.35668 | 26.91284 | 27.40596 | 27.93166 | 29.92944 | 31.45441 |
| hsa-miR-143-3p  | 23.42953            | 32.62117 | 31.15984 | 30.25065 | 28.02654 | 31.41131 | 26.25158 | 32.6585  | 26.11366 | 30.68804 | 31.25457 | 28.77698 | 32.33784 | 32.72685 |
| hsa-miR-144-3p  | 27.13186            | 33.48467 | 28.98316 | 28.81325 | 27.93071 | 29.32117 | 25.0166  | 27.98801 | 22.86458 | 26.56941 | 29.64715 | 26.22014 | 30.79912 | 31.40867 |

|                 |          |          |          |          |          |          |          |          |          |          |          |          |          |          |
|-----------------|----------|----------|----------|----------|----------|----------|----------|----------|----------|----------|----------|----------|----------|----------|
| hsa-miR-145-5p  | 27.07405 | -        | 28.20038 | 27.03226 | 27.20499 | 27.95068 | 24.93947 | 28.32221 | 25.27052 | 27.26218 | 28.01861 | 27.40745 | 28.96265 | 30.06976 |
| hsa-miR-146a-5p | 27.20551 | 32.15971 | 24.9942  | 21.44378 | 23.24762 | 25.98969 | 20.06906 | 24.9109  | 20.15443 | 25.90174 | 23.50712 | 24.73187 | 27.09098 | 26.85355 |
| hsa-miR-149-5p  | 23.44634 | 28.86465 | 37.73655 | -        | -        | -        | -        | -        | -        | -        | 39.67019 | -        | -        | -        |
| hsa-miR-150-5p  | 26.07663 | 27.07568 | 19.94347 | 19.99118 | 23.37594 | 21.87374 | 20.11203 | 24.03684 | 19.19771 | 21.91632 | 22.96607 | 21.05597 | 21.39139 | 23.64383 |
| hsa-miR-155-5p  | 20.92066 | 25.89037 | 29.2374  | 27.091   | 30.81157 | 30.70224 | 26.73587 | 33.36755 | 26.13795 | 31.764   | 30.08973 | 30.23782 | 31.92035 | 31.47224 |
| hsa-miR-15b-5p  | 30.6529  | 33.70945 | 22.14334 | 19.93451 | 21.7685  | 23.46861 | 18.6668  | 23.4742  | 18.16314 | 22.59919 | 22.48551 | 21.48839 | 23.61055 | 24.71685 |
| hsa-miR-16-5p   | 22.96395 | 30.90082 | 19.81707 | 20.2914  | 19.65659 | 20.79956 | 16.69479 | 21.17629 | 15.32465 | 19.2446  | 21.43558 | 17.963   | 21.28449 | 23.59954 |
| hsa-miR-106a-5p | 23.37627 | 30.72098 | 26.26453 | 25.55759 | 24.78093 | 26.84026 | 22.36312 | 27.83134 | 21.3133  | 25.60956 | 27.27818 | 24.59082 | 28.18799 | 29.48805 |
| hsa-miR-17-5p   |          |          |          |          |          |          |          |          |          |          |          |          |          |          |
| hsa-miR-181a-5p | 25.35605 | 32.31907 | 31.16294 | 29.22144 | 29.93254 | 30.42588 | 28.32558 | 32.65822 | 26.89761 | 30.86896 | 31.20465 | 30.46519 | 34.54178 | 34.86083 |
| hsa-miR-181b-5p | 22.83611 | 31.35027 | 26.67393 | 25.7715  | 27.71618 | 28.53551 | 24.989   | 28.81018 | 23.52884 | 28.1671  | 28.72375 | 26.70495 | 29.72535 | 29.56185 |
| hsa-miR-182-5p  | -        | -        | 29.04596 | 27.8347  | 31.24586 | 32.53423 | 27.29136 | 32.37645 | 26.54788 | 30.75239 | 30.26219 | 30.97834 | 29.80687 | 33.11051 |
| hsa-miR-183-5p  | -        | 36.19307 | 27.26519 | 28.72326 | 29.58946 | 29.68921 | 26.3862  | 33.12299 | 24.20945 | 28.43538 | 30.02598 | 27.84569 | 29.12449 | 30.9404  |
| hsa-miR-185-5p  | 25.17785 | 32.40368 | 25.69059 | 25.30199 | 25.73549 | 27.13495 | 21.77237 | 27.97886 | 20.76992 | 25.4489  | 27.70761 | 24.25588 | 28.33138 | 29.62051 |
| hsa-miR-18b-5p  | 26.98813 | 34.48228 | 30.85575 | 27.23007 | 29.8755  | 29.46506 | 26.78431 | 31.04467 | 26.0542  | 30.72802 | 29.08144 | 29.7288  | 30.5004  | 30.84355 |
| hsa-miR-195-5p  | 25.43114 | 31.22993 | 20.49792 | 20.96025 | 20.31915 | 21.36588 | 17.28935 | 21.92772 | 16.17171 | 20.06555 | 22.10033 | 18.68513 | 22.66393 | 24.40635 |
| hsa-miR-199a-5p | 24.10951 | 30.42263 | -        | 29.39029 | 29.50529 | 33.38191 | 26.16558 | 30.45889 | 26.63561 | 30.99799 | 31.49853 | 31.25109 | -        | 35.28498 |
| hsa-miR-206     | 22.04993 | 31.64445 | 28.40022 | 30.08054 | 30.4422  | 30.40902 | 29.50797 | 29.78148 | 28.49776 | 30.59755 | 31.31379 | 28.35464 | 31.56122 | 32.92329 |
| hsa-miR-208a-3p | 24.16023 | 28.08858 | 34.47503 | -        | -        | -        | -        | -        | -        | 35.33765 | -        | -        | -        | -        |
| hsa-miR-208b-3p | 22.51136 | 26.54548 | 36.2518  | -        | 34.78608 | -        | 38.89011 | -        | -        | -        | -        | -        | -        | -        |
| hsa-miR-21-5p   | 19.80391 | 26.02469 | 20.13024 | 18.22924 | 20.11253 | 21.51456 | 17.17592 | 21.40077 | 16.14753 | 21.40945 | 21.18372 | 19.9619  | 21.85162 | 22.44066 |
| hsa-miR-210-3p  | 24.16873 | 31.61115 | 29.64614 | 30.65934 | 32.90135 | 30.50999 | 29.52586 | 31.11912 | 28.95047 | 30.83035 | 31.42546 | 30.42785 | 30.24523 | 31.01924 |
| hsa-miR-214-3p  | 23.71458 | 29.30463 | 30.99845 | 32.32989 | 35.58395 | 35.28051 | 29.97543 | 32.05806 | 30.07356 | -        | 32.20391 | 31.84088 | 35.67217 | 33.97028 |
| hsa-miR-22-3p   | 20.93823 | 25.9435  | 25.37802 | 25.35955 | 24.9265  | 26.66652 | 22.25277 | 26.90019 | 21.54239 | 25.73899 | 27.00589 | 23.88407 | 29.02664 | 29.57605 |
| hsa-miR-221-3p  | 30.51735 | 31.30745 | 26.4949  | 23.12239 | 23.35901 | 27.47437 | 21.31717 | 25.6122  | 21.36353 | 26.60855 | 24.99229 | 24.97558 | 28.94979 | 28.18423 |
| hsa-miR-222-3p  | 20.32279 | 25.5316  | 24.71054 | 22.75731 | 23.98357 | 26.49528 | 21.3113  | 25.82744 | 20.93269 | 25.75152 | 25.16836 | 24.2477  | 27.80387 | 27.9106  |
| hsa-miR-223-3p  | 23.69862 | 30.99315 | 19.8501  | 17.00426 | 18.7611  | 21.20075 | 15.1716  | 21.17172 | 14.98715 | 20.29121 | 19.38201 | 19.49421 | 20.36603 | 21.298   |
| hsa-miR-224-5p  | 24.54251 | 31.25227 | 30.16747 | 25.0166  | 25.93158 | 31.99454 | 25.10411 | 27.82652 | 22.78419 | 30.08027 | 28.43651 | 28.85817 | 31.38014 | 29.62449 |

|                 |          |          |          |          |          |          |          |          |          |          |          |          |          |          |
|-----------------|----------|----------|----------|----------|----------|----------|----------|----------|----------|----------|----------|----------|----------|----------|
| hsa-miR-23a-3p  | 22.97819 | 32.46922 | 21.50987 | 18.47846 | 20.67834 | 22.89522 | 17.31827 | 22.33844 | 17.37582 | 22.1853  | 21.38811 | 21.19147 | 23.30134 | 23.01502 |
| hsa-miR-23b-3p  | 30.53204 | 35.5716  | 23.95887 | 21.38124 | 23.8474  | 25.95876 | 20.76001 | 25.41549 | 20.68184 | 25.20515 | 24.66219 | 24.26645 | 26.71513 | 26.56813 |
| hsa-miR-24-3p   | 30.41859 | 31.95936 | 24.72851 | 22.55684 | 23.01198 | 26.06339 | 20.10285 | 25.23285 | 20.42396 | 25.07601 | 24.95272 | 24.15222 | 27.79774 | 27.0654  |
| hsa-miR-25-3p   | 18.57783 | 23.61178 | 20.30212 | 19.9305  | 21.16199 | 21.6005  | 17.88064 | 22.76178 | 16.57944 | 21.17814 | 22.23244 | 19.24795 | 21.95193 | 23.71634 |
| hsa-miR-26a-5p  | 36.32061 | 36.1099  | 21.37821 | 18.94721 | 21.08862 | 23.98923 | 17.93744 | 23.34215 | 17.29604 | 22.90632 | 22.15649 | 22.31592 | 24.44178 | 24.25825 |
| hsa-miR-26b-5p  | 35.98682 | 35.93759 | 22.81866 | 20.29673 | 22.77663 | 24.87558 | 19.38868 | 25.20206 | 17.97347 | 23.78514 | 23.83220 | 23.51105 | 25.0365  | 25.88174 |
| hsa-miR-27a-3p  | 31.06448 | 29.64097 | 23.74556 | 22.97613 | 23.35426 | 25.01331 | 20.24414 | 24.69966 | 20.08678 | 24.02482 | 24.57244 | 22.94837 | 26.75629 | 26.81873 |
| hsa-miR-27b-3p  | 30.16264 | -        | 24.94802 | 23.8335  | 24.36565 | 26.72427 | 21.26946 | 26.18274 | 21.20182 | 25.33819 | 25.49470 | 24.86639 | 27.31816 | 27.73366 |
| hsa-miR-29a-3p  | 20.37791 | 30.68022 | 25.94033 | 25.88494 | 26.74145 | 26.74643 | 23.17089 | 27.50304 | 22.77501 | 25.59758 | 27.27762 | 25.5125  | 27.82874 | 29.25669 |
| hsa-miR-29b-3p  | 29.96895 | 29.933   | 25.01404 | 25.68853 | 28.05454 | 27.3012  | 23.70924 | 29.01705 | 22.22741 | 25.88455 | 28.07734 | 24.95304 | 27.52182 | 30.24283 |
| hsa-miR-29c-3p  | 24.14598 | 32.51637 | 24.84299 | 24.95012 | 25.87211 | 26.23411 | 22.37152 | 27.45581 | 21.19302 | 24.9386  | 26.73358 | 24.11314 | 27.24019 | 29.38214 |
| hsa-miR-302a-3p | 29.47895 | 35.00066 | 36.19143 | -        | -        | 36.69648 | -        | -        | -        | -        | -        | -        | 36.01073 | -        |
| hsa-miR-302b-3p | 30.34352 | 31.81234 | -        | -        | -        | -        | -        | -        | 33.82908 | 34.84256 | -        | -        | 35.90228 | -        |
| hsa-miR-30a-5p  | 25.24681 | 30.34427 | 24.42332 | 22.66556 | 23.02277 | 25.35802 | 20.11867 | 25.14254 | 19.98415 | 24.68618 | 24.76697 | 23.30667 | 26.55613 | 27.48351 |
| hsa-miR-30c-5p  | 29.79206 | -        | 25.24623 | 22.32018 | 24.17008 | 26.81529 | 21.33205 | 25.91426 | 20.62021 | 25.522   | 25.09430 | 25.62876 | 27.35299 | 27.77192 |
| hsa-miR-30d-5p  | 24.92859 | 32.88781 | 25.04517 | 22.88268 | 23.47025 | 25.93751 | 20.51163 | 25.68036 | 20.69963 | 25.69295 | 25.16578 | 23.78949 | 26.92672 | 27.66972 |
| hsa-miR-30e-5p  | 19.66148 | 30.13499 | 24.67107 | 23.18449 | 23.56135 | 25.89635 | 20.63051 | 25.38102 | 20.34683 | 24.81851 | 25.25399 | 23.58528 | 27.05286 | 27.95974 |
| hsa-miR-31-5p   | 22.62977 | 26.92727 | 32.27045 | 33.37035 | 32.84113 | 33.02276 | 31.76892 | 35.11632 | 30.6517  | 32.2333  | 31.76875 | 34.65825 | 31.08982 | 32.34542 |
| hsa-miR-320a    | 30.59409 | 31.78416 | 23.22719 | 21.05635 | 22.66095 | 24.55629 | 20.15779 | 24.45537 | 19.26395 | 24.84064 | 24.21487 | 22.40553 | 25.07976 | 25.37974 |
| hsa-miR-328-3p  | 21.83035 | 25.06771 | 25.92071 | 25.93367 | 26.6424  | 26.96506 | 24.85606 | 27.95913 | 24.57533 | 26.99701 | 27.01760 | 28.20644 | 25.69667 | 27.13356 |
| hsa-miR-342-3p  | 34.0864  | -        | 22.79533 | 22.21283 | 25.08369 | 24.29408 | 21.78333 | 25.85519 | 21.07618 | 24.31419 | 25.00080 | 23.54281 | 24.59268 | 26.51143 |
| hsa-miR-365a-3p |          |          |          |          |          |          |          |          |          |          |          |          |          |          |
| hsa-miR-365b-3p | 24.49236 | 30.66973 | 26.96491 | 26.9951  | 27.71695 | 28.83181 | 24.91408 | 30.93908 | 25.48456 | 27.78619 | 29.86240 | 27.81836 | 30.38093 | 31.74984 |
| hsa-miR-378a-3p | 28.2989  | 29.91406 | 29.44195 | 28.80047 | 28.90866 | 30.54787 | 25.64574 | 29.76385 | 25.60386 | 29.58466 | 31.20947 | 28.42261 | 31.37001 | 34.67785 |
| hsa-miR-423-3p  | 25.64837 | 33.05162 | 28.91122 | 25.75956 | 25.75579 | 29.01913 | 24.06407 | 28.66069 | 23.95883 | 29.41148 | 27.90967 | 28.31027 | 30.26495 | 30.3758  |
| hsa-miR-424-5p  | 30.34589 | -        | 25.16054 | 24.78397 | 25.47731 | 26.2241  | 21.946   | 25.73388 | 20.74836 | 25.26629 | 25.83964 | 23.72261 | 27.16743 | 28.68435 |
| hsa-miR-451a    | 26.99316 | 34.58776 | 18.03493 | 19.00587 | 18.41604 | 18.94462 | 14.94953 | 19.40052 | 13.64087 | 17.02367 | 20.17976 | 15.82266 | 20.3753  | 22.43438 |
| hsa-miR-486-5p  | 31.40771 | -        | 17.02238 | 16.53579 | 18.15936 | 18.42992 | 15.8651  | 19.56868 | 14.07065 | 18.21765 | 19.49836 | 16.62521 | 18.4887  | 20.13332 |

|                    |          |          |          |          |          |          |          |          |          |          |          |          |          |          |
|--------------------|----------|----------|----------|----------|----------|----------|----------|----------|----------|----------|----------|----------|----------|----------|
| hsa-miR-494-3p     | 33.33674 | -        | 32.58527 | 28.08669 | 28.28501 | 32.34299 | 25.76612 | 33.93539 | 27.44402 | 30.96150 | 30.36043 | 31.00075 | 35.09527 | 33.96811 |
| hsa-miR-499a-5p    | 34.69484 | -        | 31.90957 | 33.55568 | 34.22645 | -        | 30.27990 | 34.96983 | 30.34163 | 32.74298 | 35.69646 | 34.36368 | -        | 36.9164  |
| hsa-miR-7-5p       | 25.79160 | 36.10832 | 25.38497 | 26.57358 | 26.65127 | 27.12324 | 23.50724 | 28.29801 | 22.20227 | 26.71575 | 28.38017 | 25.16880 | 27.35941 | 29.80071 |
| hsa-miR-92a-3p     | 22.10689 | 29.10377 | 18.93948 | 18.08225 | 19.38331 | 20.13443 | 16.99602 | 20.95013 | 15.87147 | 20.22044 | 20.95834 | 18.12459 | 20.67945 | 22.06932 |
| hsa-miR-93-5p      | 24.77215 | 34.51086 | 25.10185 | 24.89512 | 24.01542 | 25.90282 | 21.41111 | 26.80659 | 20.88216 | 24.50971 | 25.88717 | 23.58176 | 27.92697 | 28.81531 |
| hsa-miR-98-5p      | 24.42135 | 30.57770 | 28.95216 | 25.17151 | 27.13505 | -        | 23.98332 | 29.21983 | 23.73051 | 30.20281 | 28.21214 | 29.23187 | 30.98427 | 29.87256 |
| hsa-miR-99a-5p     | 29.03651 | 30.01373 | 26.64364 | 24.98177 | 26.95329 | 28.15083 | 24.27035 | 28.49957 | 24.32134 | 27.73484 | 28.34909 | 26.95835 | 29.45461 | 29.5557  |
| SNORD61            | 29.60881 | -        | 28.4649  | 31.00081 | 32.98455 | 30.91636 | 32.00243 | 32.32595 | 30.53066 | 31.90538 | 33.82918 | 31.56787 | 33.6024  | 32.57404 |
| SNORD68            | 26.97070 | 34.58306 | 25.27023 | 30.99777 | 30.55224 | 29.10997 | 29.05469 | -        | 28.50172 | 29.13354 | 33.36228 | 29.75993 | 28.51457 | 32.40304 |
| SNORD72            | 24.73398 | 30.40427 | 36.82988 | 34.96505 | -        | -        | -        | -        | 35.33326 | -        | -        | -        | -        | -        |
| SNORD95            | 29.42813 | 31.04096 | 25.74819 | 30.36941 | 29.97839 | 26.96482 | 26.90249 | 31.95966 | 27.10395 | 28.44204 | 31.63596 | 27.16495 | 26.96741 | 32.78776 |
| SNORD96A           | 24.60286 | 28.22510 | 27.62502 | 30.37678 | 30.23673 | 29.13903 | 28.53485 | -        | 27.67612 | 29.86049 | 30.60321 | 27.80721 | 28.96089 | 32.29509 |
| RNU6-6P            | 23.65303 | 26.84755 | 28.91076 | 31.91758 | 31.27625 | 33.11799 | 30.13059 | 33.67167 | 29.43722 | 31.61308 | 32.41977 | 31.10894 | 30.99949 | -        |
| miRTC <sup>a</sup> | 23.05959 | 26.83156 | 19.24074 | 19.80461 | 19.03664 | 19.04556 | 19.18776 | 19.11975 | 18.5493  | 18.9115  | 19.26188 | 19.59476 | 21.62903 | 21.95611 |
| miRTC <sup>a</sup> | 25.00643 | 28.04658 | 19.27727 | 19.67604 | 19.10458 | 18.96431 | 19.20060 | 19.05637 | 18.59531 | 18.76497 | 19.15024 | 19.49967 | 21.81584 | 22.17700 |
| PPC <sup>b</sup>   | 20.41120 | 23.37674 | 19.70755 | 20.05218 | 19.68398 | 20.05203 | 19.98837 | 19.85644 | 20.03064 | 19.90418 | 19.92544 | 19.92142 | 20.01525 | 20.61062 |
| PPC <sup>b</sup>   | 22.96076 | 25.95099 | 19.76407 | 19.98144 | 20.05076 | 20.21896 | 19.88278 | 20.02878 | 19.99028 | 19.8882  | 20.07138 | 19.86375 | 20.08341 | 20.60325 |

<sup>a</sup>miRTC: miRNA reverse transcription control miScript Primer Assay

<sup>b</sup>PPC: Positive PCR control



**Supplementary Table S11: Basal Real-time RT-PCR cycle threshold (Ct) values of 84 cardio-miRs in non-responder patients**

| miRNA ID        | Non-responders Baseline |          |          |          |          |          |          |          |          |          |          |
|-----------------|-------------------------|----------|----------|----------|----------|----------|----------|----------|----------|----------|----------|
|                 | 1                       | 2        | 3        | 4        | 5        | 6        | 7        | 8        | 9        | 10       | 11       |
| hsa-let-7a-5p   | 24.81133                | 26.30694 | 25.65788 | 24.4667  | 22.14805 | 24.71253 | 24.2067  | 25.38032 | 16.4496  | 27.64415 | 27.38487 |
| hsa-let-7b-5p   | 23.98296                | 25.28884 | 23.91495 | 22.88947 | 20.22782 | 21.17705 | 23.40913 | 23.6377  | 15.26021 | 24.17576 | 26.34651 |
| hsa-let-7c-5p   | 27.15254                | 29.19334 | 27.68124 | 26.30528 | 23.50439 | 26.47447 | 27.33071 | 27.52283 | 18.42329 | 28.82802 | 28.38993 |
| hsa-let-7d-5p   | 25.91651                | 27.04972 | 25.83116 | 24.79937 | 22.20951 | 25.90759 | 24.99597 | 26.82879 | 16.31152 | 31.48145 | 28.92346 |
| hsa-let-7e-5p   | 25.94347                | 27.94615 | 26.71169 | 25.63599 | 23.03729 | 25.49018 | 25.0419  | 26.3096  | 17.27608 | 28.16909 | 27.82645 |
| hsa-let-7f-5p   | 26.97403                | 28.61715 | 27.97735 | 26.80365 | 24.87944 | 28.4242  | 25.59598 | 28.36728 | 18.33251 | 31.43927 | 29.99677 |
| hsa-miR-1-3p    | 32.23328                | 32.25077 | -        | 28.60281 | 25.50664 | 34.44957 | 31.72326 | 34.0499  | 25.39873 | -        | 33.19689 |
| hsa-miR-100-5p  | 26.91872                | 28.14354 | 28.37645 | 25.65108 | 23.67261 | 28.9379  | 26.82527 | 29.53639 | 23.39071 | 32.87994 | 30.60648 |
| hsa-miR-103a-3p | 30.24552                | 32.69909 | 31.24978 | 30.13565 | 28.26304 | 31.94693 | 28.97943 | 32.24696 | 20.74489 | 35.48483 | 33.58417 |
| hsa-miR-107     | 32.01397                | 35.57991 | 33.48289 | 32.28994 | 31.53936 | -        | 33.97409 | -        | 22.61087 | 33.29326 | -        |
| hsa-miR-10b-5p  | 29.70444                | 30.96512 | 31.29209 | 31.88744 | 26.71885 | 32.07006 | 29.89514 | 30.95919 | 28.77866 | -        | -        |
| hsa-miR-122-5p  | 26.51262                | 26.72275 | 26.90499 | 22.9863  | 18.39364 | 25.32844 | 25.67178 | 27.12698 | 19.9373  | 29.59958 | 27.66712 |
| hsa-miR-124-3p  | 28.40925                | 28.30576 | 29.43064 | 29.47168 | 30.38575 | 31.05756 | 29.36676 | 29.71089 | 29.34833 | 29.31572 | 29.59002 |
| hsa-miR-125a-5p | 26.1123                 | 27.7088  | 27.03022 | 25.21437 | 22.68647 | 27.21111 | 26.1851  | 27.54705 | 21.51426 | 32.29156 | 28.79344 |
| hsa-miR-125b-5p | 28.00442                | 29.0704  | 28.77772 | 26.40038 | 23.63028 | 30.59306 | 28.12024 | 30.99709 | 22.82449 | -        | 31.67853 |
| hsa-miR-126-3p  | 24.78526                | 25.15352 | 24.96992 | 22.86982 | 21.19662 | 26.95844 | 24.31072 | 26.48452 | 17.8553  | 30.94523 | 29.04055 |
| hsa-miR-130a-3p | 29.52003                | 30.18685 | 29.92437 | 28.53514 | 26.54833 | 31.5914  | 29.28011 | 32.38491 | 20.61889 | -        | -        |
| hsa-miR-133a-3p | 32.49273                | 35.97459 | 37.10251 | 34.93331 | 34.46545 | -        | 39.78593 | 35.7001  | 32.67762 | -        | -        |
| hsa-miR-133b    | 32.44858                | -        | -        | -        | 35.66105 | -        | -        | -        | 31.55307 | -        | 34.90721 |
| hsa-miR-140-5p  | 32.96822                | 32.22116 | 35.21446 | 31.19728 | 29.60947 | -        | 31.96344 | -        | 25.03494 | -        | -        |
| hsa-miR-142-3p  | 30.49862                | 29.97235 | 30.19386 | 28.20863 | 25.67191 | 35.08347 | 28.53223 | 36.63636 | 22.94332 | 33.24833 | 34.73325 |
| hsa-miR-143-3p  | 33.71299                | -        | 30.68604 | 29.68711 | 28.21034 | -        | -        | -        | 28.94549 | -        | -        |

|                               |          |          |          |          |          |          |          |          |          |          |          |
|-------------------------------|----------|----------|----------|----------|----------|----------|----------|----------|----------|----------|----------|
| hsa-miR-144-3p                | 29.86632 | 30.62327 | 30.03228 | 29.44157 | 26.48570 | -        | 32.18331 | 32.54567 | 21.15223 | -        | 33.16713 |
| hsa-miR-145-5p                | 27.52685 | 27.9099  | 27.82154 | 28.25653 | 27.28841 | 30.4266  | 28.12468 | 31.04837 | 26.09296 | 34.89249 | 31.89951 |
| hsa-miR-146a-5p               | 28.0098  | 28.62566 | 26.97116 | 25.19818 | 24.05903 | 29.31953 | 25.42715 | 30.63269 | 20.94795 | -        | 32.40827 |
| hsa-miR-149-5p                | 33.44521 | -        | -        | -        | 36.60941 | -        | -        | -        | 34.71621 | -        | -        |
| hsa-miR-150-5p                | 24.10813 | 25.05183 | 24.93781 | 24.91524 | 20.05791 | 24.4205  | 22.71652 | 25.87205 | 21.52781 | 29.50717 | 26.70975 |
| hsa-miR-155-5p                | 30.30973 | 32.21333 | 32.24989 | 32.66084 | 28.94461 | 29.54    | 31.73182 | 35.42041 | 25.96631 | 31.12611 | 33.10757 |
| hsa-miR-15b-5p                | 26.33285 | 26.79107 | 24.139   | 23.37335 | 21.64610 | 26.26671 | 23.70287 | 25.51365 | 15.92379 | 30.22613 | 27.89351 |
| hsa-miR-16-5p                 | 25.1401  | 24.78912 | 22.99171 | 21.34988 | 19.30497 | 26.24649 | 23.91134 | 23.39925 | 13.82831 | 30.6075  | 27.07226 |
| hsa-miR-106a-5p hsa-miR-17-5p | 28.85089 | 29.62017 | 29.11628 | 27.63202 | 24.90981 | 32.53523 | 28.19453 | 30.04052 | 19.81447 | 32.73845 | 29.86911 |
| hsa-miR-181a-5p               | 32.41935 | 34.11472 | 31.50655 | 32.63215 | 30.31976 | -        | 30.15489 | 33.74017 | 24.83147 | -        | -        |
| hsa-miR-181b-5p               | 28.71326 | 30.12893 | 29.89444 | 28.60162 | 26.00384 | 29.04827 | 28.06042 | 31.0819  | 22.92291 | 32.77547 | 35.60949 |
| hsa-miR-182-5p                | 29.73073 | 31.34663 | 30.23283 | 31.20394 | 29.25071 | 33.34258 | 28.95607 | 34.60933 | 21.08743 | -        | -        |
| hsa-miR-183-5p                | 31.51597 | 33.7606  | 33.83264 | 32.55724 | 28.32008 | 31.43906 | 30.36949 | 31.12971 | 19.22233 | 33.92004 | 31.68056 |
| hsa-miR-185-5p                | 29.92359 | 30.00428 | 28.30173 | 27.96551 | 24.49253 | 31.14012 | 28.21471 | 30.03633 | 18.57515 | 32.49574 | 34.47882 |
| hsa-miR-18b-5p                | 30.29969 | 33.60613 | 29.90021 | 30.01932 | 30.41582 | 32.33982 | 28.88838 | 32.45915 | 24.72671 | 32.95627 | 33.24069 |
| hsa-miR-195-5p                | 25.68329 | 25.4401  | 23.62489 | 21.91696 | 20.19385 | 26.86106 | 21.03572 | 23.96433 | 14.29516 | 32.10435 | 28.15205 |
| hsa-miR-199a-5p               | 32.40623 | 33.45205 | 36.36146 | -        | 31.90337 | -        | 34.61956 | -        | 26.76774 | -        | -        |
| hsa-miR-206                   | 29.71091 | 33.96214 | 31.11393 | 28.98229 | 29.33521 | 31.13818 | 32.94838 | 33.88058 | 32.12765 | 31.39993 | 31.93801 |
| hsa-miR-208a-3p               | 33.08848 | 39.84809 | -        | -        | -        | -        | -        | 38.15754 | 34.60326 | -        | -        |
| hsa-miR-208b-3p               | 34.23346 | 34.72229 | 33.17939 | -        | 32.20971 | -        | -        | -        | -        | -        | -        |
| hsa-miR-21-5p                 | 22.28981 | 23.99202 | 22.47824 | 20.6675  | 18.66760 | 22.66513 | 21.02494 | 23.36809 | 14.36016 | 27.85472 | 25.13013 |
| hsa-miR-210-3p                | 30.63127 | 31.13582 | 32.13097 | 30.82009 | 30.21895 | 33.04581 | 33.40361 | 30.73591 | 26.95809 | 30.97937 | 31.34713 |
| hsa-miR-214-3p                | 32.14843 | 32.61144 | 32.71647 | 33.24553 | 29.47375 | -        | 33.41637 | -        | 32.89993 | 34.75017 | 34.56253 |
| hsa-miR-22-3p                 | 27.95975 | 28.20288 | 27.61314 | 26.41494 | 24.71620 | 33.55685 | 27.7875  | 30.75035 | 20.57229 | -        | 36.96518 |
| hsa-miR-221-3p                | 28.47961 | 28.38276 | 28.14864 | 25.82673 | 25.54527 | 31.60608 | 26.65685 | 31.79063 | 21.24464 | 34.36667 | 31.64512 |
| hsa-miR-222-3p                | 27.43324 | 28.39985 | 27.48103 | 25.86304 | 24.34161 | 30.0813  | 26.03216 | 29.02768 | 21.51697 | 32.30276 | 34.10348 |
| hsa-miR-223-3p                | 22.32587 | 24.49268 | 21.9121  | 21.08635 | 19.16157 | 23.9543  | 21.83372 | 24.20052 | 15.21376 | 27.62321 | 25.38966 |

|                                 |          |          |          |          |          |          |          |          |          |          |          |
|---------------------------------|----------|----------|----------|----------|----------|----------|----------|----------|----------|----------|----------|
| hsa-miR-224-5p                  | 33.82536 | 31.02155 | 32.69709 | 30.38456 | 28.79813 | 30.94624 | 31.29113 | 34.49621 | 27.21017 | -        | 33.03044 |
| hsa-miR-23a-3p                  | 23.96070 | 25.36056 | 23.55368 | 22.0212  | 20.43876 | 24.57974 | 22.73986 | 25.65508 | 17.40952 | 28.49796 | 26.39349 |
| hsa-miR-23b-3p                  | 26.12724 | 27.85608 | 26.92706 | 25.30584 | 22.98634 | 28.01727 | 25.69257 | 28.20532 | 21.54441 | 32.78288 | 29.98447 |
| hsa-miR-24-3p                   | 27.87268 | 28.25569 | 27.58412 | 24.96817 | 23.61540 | 32.38477 | 26.8217  | 30.09324 | 20.7131  | -        | 31.93586 |
| hsa-miR-25-3p                   | 24.33797 | 25.27452 | 22.71884 | 22.59748 | 19.64668 | 23.27559 | 22.53571 | 23.21772 | 15.38526 | 30.98148 | 25.56112 |
| hsa-miR-26a-5p                  | 24.47412 | 25.9563  | 25.63191 | 24.08385 | 21.74973 | 27.70859 | 23.16214 | 27.0957  | 16.42122 | 30.99329 | 27.68921 |
| hsa-miR-26b-5p                  | 25.15673 | 27.32159 | 26.93628 | 25.36018 | 22.82048 | 27.65416 | 24.28128 | 27.20072 | 16.71431 | 32.22248 | 28.55926 |
| hsa-miR-27a-3p                  | 25.97878 | 26.95006 | 25.93308 | 24.2232  | 21.95552 | 29.71416 | 25.50834 | 28.35891 | 19.67862 | -        | 30.5935  |
| hsa-miR-27b-3p                  | 27.66308 | 27.84571 | 27.66365 | 25.41401 | 22.34634 | 29.98115 | 26.64659 | 29.46879 | 21.08978 | -        | 33.15234 |
| hsa-miR-29a-3p                  | 28.19929 | 28.85526 | 28.88099 | 27.03975 | 24.39931 | 29.84066 | 28.56586 | 30.10189 | 22.32036 | 31.60816 | 29.82602 |
| hsa-miR-29b-3p                  | 30.88939 | 30.5407  | 30.97452 | 28.34858 | 25.63511 | 31.7478  | 28.62694 | 29.64136 | 19.55225 | -        | 31.34174 |
| hsa-miR-29c-3p                  | 28.91687 | 29.08324 | 28.46128 | 26.67847 | 23.79477 | 31.91851 | 28.00257 | 29.44222 | 19.54223 | -        | 31.93087 |
| hsa-miR-302a-3p                 | 33.87630 | -        | -        | 32.20512 | 33.62856 | -        | -        | -        | -        | -        | 37.02446 |
| hsa-miR-302b-3p                 | -        | -        | -        | 36.46421 | 36.59692 | -        | -        | -        | 31.39902 | -        | -        |
| hsa-miR-30a-5p                  | 26.60989 | 27.91821 | 26.94485 | 25.1229  | 22.93262 | 30.23616 | 25.45955 | 28.28597 | 19.32807 | 31.78558 | 31.44625 |
| hsa-miR-30c-5p                  | 26.65981 | 27.81996 | 28.20612 | 26.6077  | 24.91205 | 30.17896 | 26.2557  | 30.11908 | 21.90987 | 32.90091 | 32.17997 |
| hsa-miR-30d-5p                  | 27.23291 | 28.35089 | 27.80882 | 25.9215  | 23.55762 | 30.17543 | 26.00007 | 28.72974 | 19.81652 | 31.63093 | 31.77824 |
| hsa-miR-30e-5p                  | 26.55431 | 27.96208 | 27.01433 | 25.48366 | 23.19162 | 30.07314 | 25.95978 | 28.97635 | 19.56278 | 31.72754 | 31.34951 |
| hsa-miR-31-5p                   | 31.06966 | 32.32522 | 31.54013 | 34.30622 | 31.63590 | 32.34285 | 34.37337 | 31.50013 | 31.34266 | 31.50536 | 32.41733 |
| hsa-miR-320a                    | 25.42797 | 26.93314 | 25.30085 | 24.74474 | 21.64691 | 24.09352 | 23.96898 | 26.30102 | 16.93461 | 28.0282  | 30.24259 |
| hsa-miR-328-3p                  | 24.59361 | 26.49342 | 27.06734 | 27.15777 | 26.82253 | 27.85247 | 26.74234 | 26.84609 | 25.61341 | 27.58392 | 27.09417 |
| hsa-miR-342-3p                  | 25.94322 | 27.1769  | 26.85812 | 26.45754 | 22.67694 | 28.24647 | 25.5094  | 27.89616 | 22.18208 | 28.66249 | 29.06575 |
| hsa-miR-365a-3p hsa-miR-365b-3p | 30.52937 | 32.09037 | 30.51400 | 28.41197 | 24.29078 | 31.44261 | 30.40864 | 31.09541 | 26.07396 | -        | 33.09603 |
| hsa-miR-378a-3p                 | 30.61658 | 31.41964 | 34.68985 | 31.8586  | 27.44928 | 32.87674 | 32.59548 | 33.23118 | 23.68012 | -        | -        |
| hsa-miR-423-3p                  | 29.67415 | 29.96766 | 29.96476 | 30.18772 | 28.26161 | 32.43334 | 29.02464 | 31.17397 | 25.20677 | 32.43642 | 32.43654 |
| hsa-miR-424-5p                  | 27.92038 | 28.23139 | 27.54185 | 25.88857 | 23.52522 | 31.97377 | 27.58109 | 30.54012 | 19.94684 | 33.09068 | 31.9271  |
| hsa-miR-451a                    | 23.41384 | 22.48264 | 21.96687 | 19.72102 | 17.22226 | 24.71068 | 21.69097 | 22.47973 | 12.37459 | 25.39588 | 26.64019 |

|                    |          |          |          |          |          |          |          |          |          |          |          |
|--------------------|----------|----------|----------|----------|----------|----------|----------|----------|----------|----------|----------|
| hsa-miR-486-5p     | 18.6216  | 19.93651 | 18.95077 | 19.51172 | 16.71562 | 18.72106 | 18.4695  | 19.23424 | 12.33385 | 25.28271 | 21.52177 |
| hsa-miR-494-3p     | 29.9265  | 32.52657 | 36.15216 | 30.25745 | 30.00187 | 32.88005 | 30.73361 | 35.02886 | 29.2981  | 34.34922 | 34.45171 |
| hsa-miR-499a-5p    | 33.72573 | 33.95618 | 33.93571 | 33.50202 | 29.10333 | -        | -        | -        | 30.79617 | -        | -        |
| hsa-miR-7-5p       | 30.24173 | 32.22461 | 29.10503 | 28.97482 | 25.27816 | 28.53309 | 27.99922 | 28.33868 | 19.30747 | 35.50727 | 31.11555 |
| hsa-miR-92a-3p     | 21.16287 | 22.71352 | 21.27324 | 21.29853 | 18.45877 | 22.92415 | 20.50925 | 21.95515 | 14.83917 | 29.41874 | 24.9344  |
| hsa-miR-93-5p      | 29.524   | 28.82168 | 28.03325 | 26.84008 | 24.22874 | 31.1155  | 27.71897 | 29.45488 | 18.99104 | -        | 35.74141 |
| hsa-miR-98-5p      | 29.78519 | 32.88033 | 31.32006 | 29.66981 | 28.35761 | 32.58984 | 29.71962 | 37.41221 | 23.95353 | 34.54317 | -        |
| hsa-miR-99a-5p     | 27.94616 | 29.11279 | 29.31061 | 26.81895 | 24.84456 | 29.78689 | 27.86173 | 30.30285 | 24.68749 | 33.7638  | 31.13881 |
| SNORD61            | 29.05884 | 32.051   | 32.66017 | 32.00511 | 29.37387 | 35.36753 | 31.4549  | 34.25304 | 29.85088 | -        | 36.94406 |
| SNORD68            | 33.83559 | 34.81919 | 33.27018 | -        | 27.80394 | 33.50906 | 30.6112  | -        | 28.12391 | -        | -        |
| SNORD72            | 35.27882 | -        | -        | -        | -        | -        | -        | 36.48182 | 36.6035  | -        | -        |
| SNORD95            | 30.80504 | 33.25209 | 33.30819 | 30.53891 | 27.81444 | -        | 30.33563 | 32.92751 | 26.93055 | -        | -        |
| SNORD96A           | 31.78437 | 35.3471  | 33.17014 | 32.04503 | 29.29656 | -        | 31.25276 | -        | 28.18251 | 34.69247 | 35.00496 |
| RNU6-6P            | 31.10193 | 32.15644 | -        | 32.49541 | 30.62344 | -        | 33.73945 | 34.90786 | 31.08695 | -        | -        |
| miRTC <sup>a</sup> | 18.78634 | 19.08893 | 19.29626 | 19.1168  | 19.35296 | 21.9569  | 19.69357 | 22.02296 | 21.66853 | 27.27509 | 24.27622 |
| miRTC <sup>a</sup> | 18.8164  | 18.66931 | 19.19238 | 19.31367 | 19.28120 | 22.02626 | 19.53645 | 21.8936  | 21.81053 | 27.31419 | 24.10427 |
| PPC <sup>b</sup>   | 19.86878 | 19.94911 | 19.76684 | 20.12112 | 19.69929 | 19.94468 | 19.96608 | 19.93345 | 20.01198 | 20.03554 | 20.36809 |
| PPC <sup>b</sup>   | 19.72506 | 20.0478  | 19.70191 | 19.82953 | 19.97094 | 19.94942 | 20.05788 | 19.90446 | 20.04762 | 20.09036 | 20.53596 |

<sup>a</sup>miRTC: miRNA reverse transcription control miScript Primer Assay

<sup>b</sup>PPC: Positive PCR control

<sup>c</sup>patient died before 6 -month revision

**Supplementary Table S12: Longitudinal Real-time RT-PCR cycle threshold (Ct) values of 84 cardio-miRs in non-responder patients**

| miRNA ID        | Non-responders 6 Months |          |          |          |          |          |                |                |          |          |          |
|-----------------|-------------------------|----------|----------|----------|----------|----------|----------------|----------------|----------|----------|----------|
|                 | 1                       | 2        | 3        | 4        | 5        | 6        | 7 <sup>c</sup> | 8 <sup>c</sup> | 9        | 10       | 11       |
| hsa-let-7a-5p   | 20.67119                | 18.10254 | 23.75598 | 23.94663 | 23.98955 | 24.24961 | -              | -              | 21.42821 | 25.93251 | 24.26432 |
| hsa-let-7b-5p   | 19.38917                | 15.90552 | 22.15835 | 22.49703 | 21.65863 | 22.29983 | -              | -              | 20.54238 | 24.54473 | 21.98201 |
| hsa-let-7c-5p   | 23.08038                | 20.21245 | 26.16904 | 26.77693 | 25.79901 | 26.45609 | -              | -              | 23.84579 | 28.09997 | 25.97902 |
| hsa-let-7d-5p   | 21.99577                | 18.05562 | 23.67769 | 23.91538 | 23.71139 | 23.20974 | -              | -              | 22.21428 | 26.79273 | 24.64337 |
| hsa-let-7e-5p   | 21.86782                | 19.73669 | 24.86004 | 24.97085 | 25.36580 | 25.18003 | -              | -              | 22.25653 | 26.85381 | 25.11693 |
| hsa-let-7f-5p   | 22.59794                | 21.84737 | 25.92720 | 25.93347 | 26.66564 | 26.40219 | -              | -              | 23.82061 | 28.4781  | 26.94483 |
| hsa-miR-1-3p    | 28.15801                | 27.80458 | 30.28876 | 29.9089  | 30.49525 | 31.28629 | -              | -              | 29.43527 | 32.8245  | 32.57249 |
| hsa-miR-100-5p  | 24.81277                | 23.63691 | 26.24435 | 26.96769 | 26.61417 | 27.04036 | -              | -              | 25.78295 | 31.77821 | 27.56201 |
| hsa-miR-103a-3p | 25.80979                | 24.3809  | 28.32154 | 29.77333 | 28.32657 | 27.7055  | -              | -              | 28.11699 | 31.20572 | 31.02114 |
| hsa-miR-107     | 27.28321                | 26.66047 | 30.35052 | 30.97189 | 31.78250 | 30.71893 | -              | -              | 30.84776 | 32.58277 | 34.08821 |
| hsa-miR-10b-5p  | 26.72349                | 26.97889 | 29.18225 | 31.65527 | 29.21344 | 29.05681 | -              | -              | 28.35636 | 31.73658 | 30.23461 |
| hsa-miR-122-5p  | 21.80654                | 22.34752 | 23.73457 | 24.67635 | 22.08557 | 24.5108  | -              | -              | 21.96225 | 26.30843 | 24.6585  |
| hsa-miR-124-3p  | 27.17551                | 29.49303 | 29.65023 | 29.2386  | 30.22184 | 29.38802 | -              | -              | 29.61673 | 28.9314  | 29.69263 |
| hsa-miR-125a-5p | 23.10409                | 22.86601 | 25.17866 | 25.68563 | 25.95624 | 24.53546 | -              | -              | 23.54371 | 28.10593 | 25.98127 |
| hsa-miR-125b-5p | 25.81450                | 24.3023  | 26.9099  | 28.98349 | 27.03002 | 26.95588 | -              | -              | 26.9888  | 31.20733 | 28.98571 |
| hsa-miR-126-3p  | 20.96709                | 19.46654 | 21.93995 | 22.50283 | 22.56730 | 22.38423 | -              | -              | 22.41202 | 26.95906 | 24.7959  |
| hsa-miR-130a-3p | 25.12292                | 21.62851 | 26.64352 | 28.10915 | 26.72094 | 27.09042 | -              | -              | 27.74039 | 31.73499 | 29.01722 |
| hsa-miR-133a-3p | 33.61233                | -        | 33.99025 | 35.31496 | 35.19397 | 37.07318 | -              | -              | 39.10155 | -        | 38.50649 |
| hsa-miR-133b    | 33.77158                | 38.79407 | 35.10856 | -        | -        | -        | -              | -              | 34.16043 | -        | 34.45572 |
| hsa-miR-140-5p  | 28.37843                | 26.6752  | 30.37507 | 30.55678 | 29.82215 | 29.61173 | -              | -              | 30.33461 | -        | 33.30502 |
| hsa-miR-142-3p  | 26.38321                | 26.99388 | 28.48666 | 27.40596 | 26.91284 | 27.20276 | -              | -              | 27.46846 | 31.77939 | 30.87302 |
| hsa-miR-143-3p  | 27.52182                | 29.1436  | 30.58659 | 31.25457 | 30.68804 | 31.24981 | -              | -              | 32.25723 | -        | 32.75704 |

|                               |          |          |          |          |          |          |   |   |          |          |          |
|-------------------------------|----------|----------|----------|----------|----------|----------|---|---|----------|----------|----------|
| hsa-miR-144-3p                | 25.71508 | 23.92382 | 27.33897 | 29.64715 | 26.56941 | 28.97353 | - | - | 28.82550 | 30.81448 | 29.47142 |
| hsa-miR-145-5p                | 26.68017 | 27.83815 | 27.56442 | 28.01861 | 27.26218 | 28.40628 | - | - | 29.18294 | 29.63219 | 30.34374 |
| hsa-miR-146a-5p               | 23.58296 | 22.33726 | 24.14318 | 23.50712 | 25.90174 | 24.88151 | - | - | 24.91604 | 31.82187 | 28.13587 |
| hsa-miR-149-5p                | -        | -        | -        | 39.67019 | -        | -        | - | - | -        | -        | 33.6819  |
| hsa-miR-150-5p                | 20.12927 | 19.44654 | 22.93977 | 22.96607 | 21.91632 | 21.37614 | - | - | 20.73296 | 25.97893 | 22.22126 |
| hsa-miR-155-5p                | 27.75776 | 28.74687 | 30.11877 | 30.08973 | 31.76400 | 31.97867 | - | - | 28.53275 | 33.18516 | 32.44494 |
| hsa-miR-15b-5p                | 21.34112 | 17.3111  | 22.19683 | 22.48551 | 22.59919 | 22.43958 | - | - | 22.14326 | 26.33858 | 24.41146 |
| hsa-miR-16-5p                 | 18.23173 | 15.10747 | 19.23685 | 21.43558 | 19.24460 | 20.05057 | - | - | 20.63400 | 24.1394  | 21.5239  |
| hsa-miR-106a-5p hsa-miR-17-5p | 24.04849 | 21.37066 | 25.96406 | 27.27818 | 25.60956 | 26.09411 | - | - | 27.38828 | 31.61787 | 28.06207 |
| hsa-miR-181a-5p               | 28.75554 | 28.5161  | 31.6327  | 31.20465 | 30.86896 | 30.08088 | - | - | 32.47554 | 32.46032 | 35.04068 |
| hsa-miR-181b-5p               | 25.86926 | 23.24813 | 28.20375 | 28.72375 | 28.16710 | 27.32217 | - | - | 27.30159 | 31.891   | 28.70656 |
| hsa-miR-182-5p                | 29.27318 | 25.94592 | 29.66649 | 30.26219 | 30.75239 | 31.65779 | - | - | 27.83245 | 31.71438 | 30.71989 |
| hsa-miR-183-5p                | 26.99822 | 22.97217 | 29.45778 | 30.02598 | 28.43538 | 28.72161 | - | - | 26.48644 | 30.43638 | 28.04388 |
| hsa-miR-185-5p                | 23.40529 | 20.2767  | 25.28329 | 27.70761 | 25.44890 | 26.53869 | - | - | 26.05976 | 30.7605  | 27.8626  |
| hsa-miR-18b-5p                | 27.5803  | 27.30177 | 29.53677 | 29.08144 | 30.72802 | 30.16422 | - | - | 29.94535 | 35.36157 | 33.1069  |
| hsa-miR-195-5p                | 18.95043 | 15.98473 | 19.96098 | 22.10033 | 20.06555 | 20.68194 | - | - | 21.25583 | 24.93004 | 22.5215  |
| hsa-miR-199a-5p               | 30.61961 | 32.14219 | 30.03401 | 31.49853 | 30.99799 | 32.91945 | - | - | 31.94575 | -        | -        |
| hsa-miR-206                   | 30.74669 | 29.98842 | 30.53782 | 31.31379 | 30.59755 | 31.98948 | - | - | 31.29835 | 32.30148 | 31.49421 |
| hsa-miR-208a-3p               | 35.81211 | -        | 34.41933 | -        | 35.33765 | -        | - | - | -        | -        | -        |
| hsa-miR-208b-3p               | 35.81045 | 32.92782 | 36.36019 | -        | -        | -        | - | - | -        | -        | -        |
| hsa-miR-21-5p                 | 18.79363 | 16.04859 | 20.74878 | 21.18372 | 21.40945 | 20.68246 | - | - | 19.91817 | 23.96186 | 21.89272 |
| hsa-miR-210-3p                | 29.49498 | 30.2469  | 31.09182 | 31.42546 | 30.83035 | 30.98382 | - | - | 30.1407  | 30.14078 | 30.52664 |
| hsa-miR-214-3p                | 29.96683 | 29.71264 | 33.93565 | 32.20391 | -        | -        | - | - | 32.367   | -        | 34.53548 |
| hsa-miR-22-3p                 | 24.07269 | 20.99017 | 24.39359 | 27.00589 | 25.73899 | 25.41677 | - | - | 27.07809 | 31.04381 | 28.39486 |
| hsa-miR-221-3p                | 23.71901 | 22.40965 | 24.22673 | 24.99229 | 26.60855 | 25.47477 | - | - | 26.63779 | 33.21243 | 29.97151 |
| hsa-miR-222-3p                | 22.95844 | 20.96665 | 24.97688 | 25.16836 | 25.75152 | 24.68369 | - | - | 25.44353 | 31.08191 | 27.50385 |
| hsa-miR-223-3p                | 17.40850 | 17.95729 | 19.40686 | 19.38201 | 20.29121 | 19.29384 | - | - | 19.06306 | 24.45714 | 21.73299 |

|                                 |          |          |          |          |          |          |   |   |          |          |          |
|---------------------------------|----------|----------|----------|----------|----------|----------|---|---|----------|----------|----------|
| hsa-miR-224-5p                  | 27.28206 | 26.64782 | 28.49830 | 28.43651 | 30.08027 | 27.21929 | - | - | 30.49158 | -        | 31.69626 |
| hsa-miR-23a-3p                  | 20.10557 | 19.28454 | 21.1107  | 21.38811 | 22.18530 | 21.35079 | - | - | 21.05217 | 26.1745  | 23.84112 |
| hsa-miR-23b-3p                  | 23.23867 | 21.82141 | 24.58714 | 24.66219 | 25.20515 | 24.13987 | - | - | 24.04287 | 29.72972 | 26.73794 |
| hsa-miR-24-3p                   | 23.36449 | 22.3228  | 23.96472 | 24.95272 | 25.07601 | 24.84631 | - | - | 24.94426 | 29.86362 | 27.65765 |
| hsa-miR-25-3p                   | 18.95297 | 15.06392 | 20.64244 | 22.23244 | 21.17814 | 20.53004 | - | - | 20.38542 | 24.16978 | 21.54683 |
| hsa-miR-26a-5p                  | 20.72313 | 19.74939 | 22.75047 | 22.15649 | 22.90632 | 21.86156 | - | - | 21.61098 | 27.24788 | 24.28947 |
| hsa-miR-26b-5p                  | 21.03555 | 20.18047 | 24.23211 | 23.83220 | 23.78514 | 23.15302 | - | - | 22.62446 | 27.90432 | 24.75421 |
| hsa-miR-27a-3p                  | 22.74397 | 21.07528 | 23.51771 | 24.57244 | 24.02482 | 24.39931 | - | - | 23.93456 | 28.86074 | 25.8675  |
| hsa-miR-27b-3p                  | 23.97501 | 22.54743 | 24.67872 | 25.49470 | 25.33819 | 25.98126 | - | - | 25.14972 | 29.76769 | 27.28793 |
| hsa-miR-29a-3p                  | 25.08566 | 24.69121 | 26.49275 | 27.27762 | 25.59758 | 26.46419 | - | - | 26.75188 | 29.0841  | 28.1708  |
| hsa-miR-29b-3p                  | 25.26571 | 22.86137 | 27.35209 | 28.07734 | 25.88455 | 25.99825 | - | - | 26.20848 | 30.37717 | 27.92126 |
| hsa-miR-29c-3p                  | 24.06257 | 22.64756 | 25.58276 | 26.73358 | 24.93860 | 25.40136 | - | - | 25.98595 | 29.58814 | 27.27649 |
| hsa-miR-302a-3p                 | 34.17590 | -        | 34.31525 | -        | -        | 35.34549 | - | - | 37.30429 | -        | -        |
| hsa-miR-302b-3p                 | 35.34898 | 33.40471 | 34.17100 | -        | 34.84256 | -        | - | - | 34.71580 | -        | -        |
| hsa-miR-30a-5p                  | 22.60695 | 20.18355 | 23.85548 | 24.76697 | 24.68618 | 24.57494 | - | - | 25.16373 | 29.16998 | 26.62144 |
| hsa-miR-30c-5p                  | 23.17631 | 22.88563 | 25.19413 | 25.0943  | 25.52200 | 24.51542 | - | - | 25.25086 | 30.62834 | 27.97795 |
| hsa-miR-30d-5p                  | 22.98790 | 20.6515  | 24.44204 | 25.16578 | 25.69295 | 25.35846 | - | - | 25.35369 | 29.37332 | 26.99463 |
| hsa-miR-30e-5p                  | 22.87234 | 20.80281 | 23.91546 | 25.25399 | 24.81851 | 25.00339 | - | - | 25.63482 | 29.59474 | 27.08336 |
| hsa-miR-31-5p                   | 29.78541 | 31.74102 | 31.41723 | 31.76875 | 32.23330 | 32.24521 | - | - | 31.57814 | 31.44342 | 32.06218 |
| hsa-miR-320a                    | 21.94687 | 17.20836 | 23.72131 | 24.21487 | 24.84064 | 23.65791 | - | - | 22.62613 | 27.15543 | 24.18483 |
| hsa-miR-328-3p                  | 24.94798 | 26.00662 | 25.00233 | 27.01760 | 26.99701 | 27.26189 | - | - | 26.38899 | 26.98575 | 27.24166 |
| hsa-miR-342-3p                  | 22.98133 | 21.61814 | 24.7984  | 25.00080 | 24.31419 | 23.91124 | - | - | 24.09616 | 27.76762 | 25.49711 |
| hsa-miR-365a-3p hsa-miR-365b-3p | 26.65371 | 25.02785 | 28.99107 | 29.8624  | 27.78619 | 28.53593 | - | - | 27.22315 | 31.52575 | 30.33264 |
| hsa-miR-378a-3p                 | 27.17353 | 25.03761 | 29.09335 | 31.20947 | 29.58466 | 29.81866 | - | - | 29.94354 | 33.1348  | 32.5244  |
| hsa-miR-423-3p                  | 26.40878 | 25.01031 | 27.97436 | 27.90967 | 29.41148 | 28.58388 | - | - | 28.64653 | 31.69756 | 32.33381 |
| hsa-miR-424-5p                  | 24.81689 | 20.87552 | 24.77142 | 25.83964 | 25.26629 | 25.12033 | - | - | 25.53704 | 28.64404 | 26.95366 |
| hsa-miR-451a                    | 16.80462 | 13.21976 | 17.55974 | 20.17976 | 17.02367 | 17.82229 | - | - | 19.38987 | 22.77194 | 20.25308 |

|                    |          |          |          |          |          |          |   |   |          |          |          |
|--------------------|----------|----------|----------|----------|----------|----------|---|---|----------|----------|----------|
| hsa-miR-486-5p     | 15.96543 | 12.14002 | 17.99886 | 19.49836 | 18.21765 | 17.13469 | - | - | 17.17519 | 20.76943 | 17.64437 |
| hsa-miR-494-3p     | 28.19548 | 30.3216  | 29.46409 | 30.36043 | 30.96150 | 30.14024 | - | - | 33.62355 | 33.97069 | 36.89389 |
| hsa-miR-499a-5p    | 33.19468 | 30.90421 | 32.01321 | 35.69646 | 32.74298 | 37.64043 | - | - | 33.29376 | 37.8152  | 34.20096 |
| hsa-miR-7-5p       | 24.85074 | 21.2627  | 26.98492 | 28.38017 | 26.71575 | 26.73566 | - | - | 26.96581 | 29.20069 | 27.03054 |
| hsa-miR-92a-3p     | 17.57005 | 14.2926  | 19.68404 | 20.95834 | 20.22044 | 19.83546 | - | - | 19.30787 | 22.65953 | 20.16705 |
| hsa-miR-93-5p      | 23.12982 | 19.94123 | 24.75322 | 25.88717 | 24.50971 | 25.11983 | - | - | 25.94066 | 30.11272 | 27.20244 |
| hsa-miR-98-5p      | 27.80822 | 26.36992 | 28.8484  | 28.21214 | 30.20281 | 29.06903 | - | - | 27.22635 | 34.94385 | 32.14102 |
| hsa-miR-99a-5p     | 25.8686  | 24.69474 | 27.16636 | 28.34909 | 27.73484 | 28.06504 | - | - | 26.69628 | 31.87579 | 28.92958 |
| SNORD61            | 27.4108  | 28.83534 | 30.17895 | 33.82918 | 31.90538 | 30.87704 | - | - | 34.63133 | 35.63515 | 34.46188 |
| SNORD68            | 25.61183 | 28.46518 | 32.39809 | 33.36228 | 29.13354 | 28.32876 | - | - | 32.92159 | -        | 31.85387 |
| SNORD72            | 36.12534 | 36.54549 | 34.9552  | -        | -        | 34.64566 | - | - | -        | -        | -        |
| SNORD95            | 24.95289 | 26.04479 | 32.00365 | 31.63596 | 28.44204 | 28.61174 | - | - | 30.12249 | 33.39253 | 31.17332 |
| SNORD96A           | 28.07045 | 28.70503 | 30.94636 | 30.60321 | 29.86049 | 30.67915 | - | - | 29.90326 | -        | 32.29078 |
| RNU6-6P            | 26.51749 | 31.58734 | 31.15942 | 32.41977 | 31.61308 | 30.27643 | - | - | 32.93758 | 35.64695 | 35.01402 |
| miRTC <sup>a</sup> | 18.4449  | 20.01607 | 18.65918 | 19.26188 | 18.91150 | 19.57762 | - | - | 21.74536 | 21.40635 | 22.29729 |
| miRTC <sup>a</sup> | 18.42163 | 19.9491  | 18.57195 | 19.15024 | 18.76497 | 19.57963 | - | - | 21.94222 | 21.60959 | 22.17055 |
| PPC <sup>b</sup>   | 19.83464 | 19.878   | 19.93641 | 19.92544 | 19.90418 | 20.10901 | - | - | 19.8953  | 20.02168 | 20.74307 |
| PPC <sup>b</sup>   | 19.94724 | 19.87483 | 20.08621 | 20.07138 | 19.88820 | 19.7551  | - | - | 19.9417  | 20.08331 | 20.57839 |

<sup>a</sup>miRTC: miRNA reverse transcription control miScript Primer Assay

<sup>b</sup>PPC: Positive PCR control

<sup>c</sup>patient died before 6 -month revision
